# Supplementary material
Source: PubMed Central journal article supplement (PMC6398275)
Supplement: JB.00662-18-s0001.pdf [file JB.00662-18-s0001.pdf]

**Supplemental Table S1. All *B. anthracis* proteins identified**

| <b>N</b> | <b>Uniprot accession</b> | <b>Gene name</b>           | <b>Function</b>                                                  | <b>Dor<sup>a</sup></b> | <b>Germ<sup>b</sup></b> |
|----------|--------------------------|----------------------------|------------------------------------------------------------------|------------------------|-------------------------|
| 1        | B9ZSG0                   | <i>truB</i>                | tRNA pseudouridine synthase B                                    | +                      | +                       |
| 2        | P62176                   | <i>rpsM</i>                | 30S ribosomal protein S13                                        | +                      | +                       |
| 3        | P77819                   | <i>rpoC</i>                | DNA-directed RNA polymerase subunit beta'                        | +                      | +                       |
| 4        | P94217                   | <i>eag</i>                 | S-layer protein EA1                                              | +                      | +                       |
| 5        | Q6HR05                   | <i>BAS4994</i>             | Lipoprotein, putative                                            | +                      | +                       |
| 6        | Q6HRE6                   | <i>csd</i>                 | Cysteine desulfurase                                             | -                      | +                       |
| 7        | Q6HSS4                   | <i>BAS4367</i>             | Lon protease                                                     | -                      | +                       |
| 8        | Q6HSW8                   | <i>BAS4323</i>             | Forespore-specific protein, putative                             | +                      | +                       |
| 9        | Q6HTK0                   | <i>BAS4088</i>             | Acetyl-CoA carboxylase, biotin carboxylase                       | -                      | +                       |
| 10       | Q6HU42                   | <i>BAS3896</i>             | Putative uncharacterized protein                                 | -                      | +                       |
| 11       | Q6HUJ4                   | <i>ylyB</i>                | Pseudouridine synthase                                           | +                      | +                       |
| 12       | Q6HW55                   | <i>BAS3176</i>             | Putative uncharacterized protein                                 | -                      | +                       |
| 13       | Q6HZK6                   | <i>BAS1969</i>             | Metallo-beta-lactamase family protein                            | -                      | +                       |
| 14       | Q6I0U2                   | <i>BAS1522</i>             | Metallo-beta-lactamase family protein                            | +                      | +                       |
| 15       | Q6I180                   | <i>rluB</i>                | Pseudouridine synthase                                           | +                      | +                       |
| 16       | Q6I2F1                   | <i>NA (WP_000554487.1)</i> | Putative uncharacterized protein                                 | +                      | +                       |
| 17       | Q6I447                   | <i>GBAA_0367</i>           | Amino acid ABC transporter, solute binding protein               | +                      | -                       |
| 18       | Q6I460                   | <i>NA (WP_000051541.1)</i> | Putative uncharacterized protein                                 | +                      | +                       |
| 19       | Q6I4E9                   | <i>tsaD</i>                | Probable tRNA threonylcarbamoyladenine biosynthesis protein Gcp  | +                      | +                       |
| 20       | Q6I4F4                   | <i>BAS0241</i>             | S1 RNA binding domain protein                                    | -                      | +                       |
| 21       | Q81JD9                   | <i>mnmE</i>                | tRNA modification GTPase MnmE                                    | +                      | +                       |
| 22       | Q81JE0                   | <i>fabZ</i>                | 3-hydroxyacyl-[acyl-carrier-protein] dehydratase FabZ            | +                      | +                       |
| 23       | Q81JE1                   | <i>GBAA_4943</i>           | Putative tRNA binding domain protein                             | +                      | -                       |
| 24       | Q81JF3                   | <i>GBAA_2171</i>           | PBS lyase HEAT-like repeat domain protein                        | +                      | +                       |
| 25       | Q81JF8                   | <i>fabI</i>                | Enoyl-[acyl-carrier-protein] reductase [NADH]                    | +                      | +                       |
| 26       | Q81JF9                   | <i>fabF</i>                | 3-oxoacyl-[acyl-carrier-protein] synthase 2                      | +                      | +                       |
| 27       | Q81JG0                   | <i>fabH1</i>               | 3-oxoacyl-[acyl-carrier-protein] synthase 3 protein 1            | +                      | +                       |
| 28       | Q81JG6                   | <i>fabG</i>                | 3-oxoacyl-(Acyl-carrier-protein) reductase                       | +                      | +                       |
| 29       | Q81JH1                   | <i>gidC2</i>               | Membrane protein insertase YidC 2                                | +                      | +                       |
| 30       | Q81JH3                   | <i>mnmG</i>                | tRNA uridine 5-carboxymethylaminomethyl modification enzyme MnmG | +                      | +                       |
| 31       | Q81JH4                   | <i>rsmG</i>                | Ribosomal RNA small subunit methyltransferase G                  | -                      | +                       |
| 32       | Q81JI1                   | <i>yhcF</i>                | GTP-binding protein YhcF                                         | +                      | +                       |
| 33       | Q81JI3                   | <i>ssb</i>                 | Single-stranded DNA-binding protein                              | +                      | +                       |
| 34       | Q81JI9                   | <i>purA</i>                | Adenylosuccinate synthetase                                      | +                      | +                       |
| 35       | Q81JJ0                   | <i>yycF</i>                | DNA-binding response regulator YycF                              | -                      | +                       |
| 36       | Q81JJ5                   | <i>GBAA_5710</i>           | Serine protease                                                  | +                      | -                       |
| 37       | Q81JL7                   | <i>msrAB</i>               | Peptide methionine sulfoxide reductase                           | +                      | +                       |
| 38       | Q81JM0                   | <i>GBAA_5684</i>           | Glycosyl transferase, group 2 family protein                     | +                      | +                       |
| 39       | Q81JM8                   | <i>GBAA_5675</i>           | Cytosolic long-chain acyl-CoA thioester hydrolase family protein | -                      | +                       |
| 40       | Q81JN3                   | <i>GBAA_5670</i>           | Glycosyl transferase, group 1 family protein                     | +                      | +                       |
| 41       | Q81JP0                   | <i>thiD2</i>               | Phosphomethylpyrimidine kinase                                   | +                      | +                       |
| 42       | Q81JR0                   | <i>gerQ</i>                | Spore coat protein GerQ                                          | +                      | +                       |
| 43       | Q81JR1                   | <i>cwlJ2</i>               | Cell wall hydrolase                                              | +                      | +                       |
| 44       | Q81JR3                   | <i>BA_5637</i>             | UPF0447 protein BA_5637/GBAA_5637/BAS5239                        | +                      | +                       |
| 45       | Q81JR4                   | <i>pta</i>                 | Phosphate acetyltransferase                                      | +                      | +                       |
| 46       | Q81JT0                   | <i>speE1</i>               | Spermidine synthase 1                                            | +                      | +                       |
| 47       | Q81JT1                   | <i>speB</i>                | Agmatinase                                                       | +                      | +                       |
| 48       | Q81JT7                   | <i>argS1</i>               | Arginine-tRNA ligase 1                                           | +                      | +                       |

|     |        |                  |                                                          |   |   |
|-----|--------|------------------|----------------------------------------------------------|---|---|
| 49  | Q81JU4 | <i>maP3</i>      | Methionine aminopeptidase                                | - | + |
| 50  | Q81JV5 | <i>GBAA_5589</i> | Acetyl-CoA acetyltransferase                             | + | + |
| 51  | Q81JV6 | <i>GBAA_5588</i> | 3-hydroxyacyl-CoA dehydrogenase                          | + | + |
| 52  | Q81JV7 | <i>GBAA_5587</i> | Acyl-CoA dehydrogenase                                   | - | + |
| 53  | Q81JV8 | <i>GBAA_5586</i> | Acyl-CoA dehydrogenase                                   | + | + |
| 54  | Q81JW0 | <i>rpoE</i>      | Probable DNA-directed RNA polymerase subunit delta       | + | + |
| 55  | Q81JW1 | <i>pyrG</i>      | CTP synthase                                             | + | + |
| 56  | Q81JW4 | <i>fba2</i>      | Fructose-bisphosphate aldolase, class II                 | + | + |
| 57  | Q81JW5 | <i>murA2</i>     | UDP-N-acetylglucosamine 1-carboxyvinyltransferase 2      | + | - |
| 58  | Q81JW8 | <i>rho</i>       | Transcription termination factor Rho                     | + | + |
| 59  | Q81JX1 | <i>prfA</i>      | Peptide chain release factor 1                           | + | + |
| 60  | Q81JX8 | <i>GBAA_5565</i> | Putative uncharacterized protein                         | + | - |
| 61  | Q81JY0 | <i>crr</i>       | Glucose-specific phosphotransferase enzyme IIA component | + | + |
| 62  | Q81JY4 | <i>glyA</i>      | Serine hydroxymethyltransferase                          | + | + |
| 63  | Q81JY5 | <i>upp</i>       | Uracil phosphoribosyltransferase                         | + | + |
| 64  | Q81JZ1 | <i>atpF</i>      | ATP synthase subunit b                                   | + | + |
| 65  | Q81JZ2 | <i>atpH</i>      | ATP synthase subunit delta                               | + | + |
| 66  | Q81JZ3 | <i>atpA</i>      | ATP synthase subunit alpha                               | + | + |
| 67  | Q81JZ4 | <i>atpG</i>      | ATP synthase gamma chain                                 | + | + |
| 68  | Q81JZ5 | <i>atpD</i>      | ATP synthase subunit beta                                | + | + |
| 69  | Q81K13 | <i>murA1</i>     | UDP-N-acetylglucosamine 1-carboxyvinyltransferase 1      | + | + |
| 70  | Q81K21 | <i>mbl</i>       | Mbl protein                                              | + | + |
| 71  | Q81K33 | <i>tagU</i>      | Transcriptional regulator LytR                           | + | - |
| 72  | Q81K34 | <i>galE1</i>     | UDP-glucose 4-epimerase                                  | + | + |
| 73  | Q81K66 | <i>sodC</i>      | Superoxide dismutase [Cu-Zn]                             | + | + |
| 74  | Q81K67 | <i>GBAA_5138</i> | Aminotransferase, class I/II                             | + | + |
| 75  | Q81K71 | <i>yugG</i>      | Transcriptional regulator, AsnC family                   | - | + |
| 76  | Q81K75 | <i>pgi</i>       | Glucose-6-phosphate isomerase                            | + | + |
| 77  | Q81K89 | <i>BA_5116</i>   | Putative uncharacterized protein                         | + | + |
| 78  | Q81K96 | <i>menB</i>      | Naphthoate synthase                                      | + | + |
| 79  | Q81KB4 | <i>GBAA_5087</i> | DNA-binding response regulator                           | - | + |
| 80  | Q81KC7 | <i>hpt2</i>      | Hypoxanthine phosphoribosyltransferase                   | + | + |
| 81  | Q81KD9 | <i>GBAA_5061</i> | Putative uncharacterized protein                         | + | - |
| 82  | Q81KE1 | <i>GBAA_5059</i> | Putative uncharacterized protein                         | + | - |
| 83  | Q81KI0 | <i>metK</i>      | S-adenosylmethionine synthase                            | + | + |
| 84  | Q81KK6 | <i>leuS</i>      | Leucine--tRNA ligase                                     | + | + |
| 85  | Q81KM8 | <i>gdH</i>       | Glucose 1-dehydrogenase                                  | + | + |
| 86  | Q81KN9 | <i>GBAA_4955</i> | 2'-5' RNA ligase family protein, putative                | - | + |
| 87  | Q81KP6 | <i>GBAA_4947</i> | Peptidase, M42 family                                    | + | + |
| 88  | Q81KQ1 | <i>GBAA_4939</i> | Putative uncharacterized protein                         | + | + |
| 89  | Q81KQ2 | <i>murC</i>      | UDP-N-acetylmuramate--L-alanine ligase                   | + | + |
| 90  | Q81KQ3 | <i>GBAA_4937</i> | Putative ribosomal-protein-serine acetyltransferase      | - | + |
| 91  | Q81KQ7 | <i>GBAA_4933</i> | Aminopeptidase, putative                                 | + | + |
| 92  | Q81KR1 | <i>ccpA</i>      | Catabolite control protein A                             | + | + |
| 93  | Q81KS9 | <i>tyrS1</i>     | Tyrosine--tRNA ligase 1                                  | + | + |
| 94  | Q81KT2 | <i>rpsD</i>      | 30S ribosomal protein S4                                 | + | + |
| 95  | Q81KU0 | <i>thil</i>      | Probable tRNA sulfurtransferase                          | + | + |
| 96  | Q81KU4 | <i>GBAA_4894</i> | Putative uncharacterized protein                         | + | - |
| 97  | Q81KU5 | <i>nadK2</i>     | Probable inorganic polyphosphate/ATP-NAD kinase 2        | + | + |
| 98  | Q81KU7 | <i>GBAA_4891</i> | Putative uncharacterized protein                         | + | + |
| 99  | Q81KU8 | <i>tpx</i>       | Probable thiol peroxidase                                | + | + |
| 100 | Q81KV0 | <i>ackA</i>      | Acetate kinase                                           | + | + |
| 101 | Q81KV3 | <i>GBAA_4885</i> | Putative uncharacterized protein                         | + | + |

|     |        |                  |                                                                    |   |   |
|-----|--------|------------------|--------------------------------------------------------------------|---|---|
| 102 | Q81KW2 | <i>BA_4875</i>   | Universal stress family protein                                    | + | + |
| 103 | Q81KX5 | <i>ykvY</i>      | Proline dipeptidase                                                | + | + |
| 104 | Q81KX6 | <i>BA_4860</i>   | UPF0173 metal-dependent hydrolase<br>BA_4860/GBAA_4860/BAS4507     | - | + |
| 105 | Q81KX8 | <i>GBAA_4858</i> | Thioesterase family protein                                        | - | + |
| 106 | Q81KY2 | <i>GBAA_4852</i> | DHH subfamily 1 protein                                            | + | + |
| 107 | Q81KY6 | <i>BA_4848</i>   | Malate dehydrogenase, putative                                     | - | + |
| 108 | Q81KY8 | <i>accD</i>      | Acetyl-coenzyme A carboxylase carboxyl transferase<br>subunit beta | - | + |
| 109 | Q81KZ0 | <i>pfkA</i>      | 6-phosphofructokinase                                              | + | + |
| 110 | Q81KZ1 | <i>pyk</i>       | Pyruvate kinase                                                    | + | + |
| 111 | Q81KZ6 | <i>citC</i>      | Isocitrate dehydrogenase [NADP]                                    | + | + |
| 112 | Q81L03 | <i>polA</i>      | DNA polymerase                                                     | + | + |
| 113 | Q81L14 | <i>thrS2</i>     | Threonine--tRNA ligase                                             | + | + |
| 114 | Q81L15 | <i>infC</i>      | Translation initiation factor IF-3                                 | + | + |
| 115 | Q81L16 | <i>rpml</i>      | 50S ribosomal protein L35                                          | + | + |
| 116 | Q81L17 | <i>rplT</i>      | 50S ribosomal protein L20                                          | + | + |
| 117 | Q81L18 | <i>GBAA_4816</i> | Putative uncharacterized protein                                   | + | + |
| 118 | Q81L19 | <i>BA_4815</i>   | Peptidase, M42 family                                              | + | + |
| 119 | Q81L29 | <i>BA_4805</i>   | RNA methyltransferase, TrmH family                                 | + | + |
| 120 | Q81L30 | <i>pheS</i>      | Phenylalanine--tRNA ligase alpha subunit                           | + | + |
| 121 | Q81L31 | <i>pheT</i>      | Phenylalanine--tRNA ligase beta subunit                            | + | + |
| 122 | Q81L32 | <i>asnS</i>      | Asparagine--tRNA ligase                                            | + | + |
| 123 | Q81L39 | <i>GBAA_4795</i> | PHP domain protein                                                 | + | + |
| 124 | Q81L40 | <i>mutS2</i>     | MutS2 protein                                                      | + | + |
| 125 | Q81L52 | <i>GBAA_4780</i> | Putative uncharacterized protein                                   | + | - |
| 126 | Q81L65 | <i>fpuA</i>      | Iron compound ABC transporter, iron compound-binding<br>protein    | + | - |
| 127 | Q81L70 | <i>GBAA_4761</i> | Enoyl-CoA hydratase/isomerase family protein                       | + | + |
| 128 | Q81L77 | <i>sdhA</i>      | Succinate dehydrogenase, flavoprotein subunit                      | + | - |
| 129 | Q81L79 | <i>GBAA_4751</i> | 4-hydroxybenzoyl-CoA thioesterase, putative                        | - | + |
| 130 | Q81L82 | <i>GBAA_4746</i> | 5'-nucleotidase, lipoprotein e(P4) family                          | + | - |
| 131 | Q81LA9 | <i>rph</i>       | Ribonuclease PH                                                    | + | + |
| 132 | Q81LB0 | <i>BA_4714</i>   | Non-canonical purine NTP pyrophosphatase                           | + | + |
| 133 | Q81LB1 | <i>GBAA_4713</i> | Phosphoesterase, putative                                          | + | + |
| 134 | Q81LB4 | <i>GBAA_4710</i> | Putative uncharacterized protein                                   | + | + |
| 135 | Q81LB9 | <i>clpX</i>      | ATP-dependent Clp protease ATP-binding subunit ClpX                | + | + |
| 136 | Q81LC1 | <i>lon</i>       | Lon protease                                                       | + | + |
| 137 | Q81LC3 | <i>GBAA_4700</i> | Organic hydroperoxide resistance protein                           | + | - |
| 138 | Q81LC9 | <i>hemB</i>      | Delta-aminolevulinic acid dehydratase                              | + | + |
| 139 | Q81LD0 | <i>hemL2</i>     | Glutamate-1-semialdehyde 2,1-aminomutase 2                         | + | + |
| 140 | Q81LD3 | <i>valS</i>      | Valine--tRNA ligase                                                | + | + |
| 141 | Q81LD6 | <i>maf</i>       | Septum formation protein Maf                                       | - | + |
| 142 | Q81LD8 | <i>mreB</i>      | Rod shape-determining protein MreB                                 | + | + |
| 143 | Q81LE6 | <i>rplU</i>      | 50S ribosomal protein L21                                          | + | + |
| 144 | Q81LE8 | <i>rpmA</i>      | 50S ribosomal protein L27                                          | + | + |
| 145 | Q81LF0 | <i>obg</i>       | GTPase obg                                                         | + | + |
| 146 | Q81LH2 | <i>tgt</i>       | Queuine tRNA-ribosyltransferase                                    | + | + |
| 147 | Q81LH8 | <i>secDF</i>     | Protein-export membrane protein SecDF                              | + | - |
| 148 | Q81LI1 | <i>apt</i>       | Adenine phosphoribosyltransferase                                  | + | + |
| 149 | Q81LI2 | <i>relA</i>      | GTP diphosphokinase                                                | + | + |
| 150 | Q81LI6 | <i>hisS-2</i>    | Histidine--tRNA ligase 2                                           | + | + |
| 151 | Q81LI7 | <i>aspS</i>      | Aspartate--tRNA ligase                                             | + | + |
| 152 | Q81LI8 | <i>GBAA_4630</i> | HesA/moeB/thiF family protein                                      | + | + |
| 153 | Q81LJ2 | <i>GBAA_4626</i> | Aminotransferase, class V                                          | + | + |

|     |        |                  |                                                            |   |   |
|-----|--------|------------------|------------------------------------------------------------|---|---|
| 154 | Q81LK0 | <i>alaS</i>      | Alanine--tRNA ligase                                       | + | + |
| 155 | Q81LL4 | <i>mtnN</i>      | 5'-methylthioadenosine/S-adenosylhomocysteine nucleosidase | + | + |
| 156 | Q81LL6 | <i>GBAA_4600</i> | Cys/Met metabolism PLP-dependent enzyme                    | + | + |
| 157 | Q81LM6 | <i>GBAA_4590</i> | DNA-binding protein                                        | - | + |
| 158 | Q81LP7 | <i>psd</i>       | Phosphatidylserine decarboxylase proenzyme                 | + | + |
| 159 | Q81LP9 | <i>GBAA_4563</i> | Hydrolase, HAD subfamily IIIA                              | - | + |
| 160 | Q81LQ0 | <i>GBAA_4562</i> | GTPase family protein                                      | + | + |
| 161 | Q81LQ6 | <i>rsfS</i>      | lojap-like ribosome-associated protein                     | + | + |
| 162 | Q81LR5 | <i>gpr</i>       | Germination protease                                       | + | + |
| 163 | Q81LR7 | <i>lepA</i>      | Elongation factor 4                                        | + | + |
| 164 | Q81LS2 | <i>dnaK</i>      | Chaperone protein DnaK                                     | + | + |
| 165 | Q81LS3 | <i>dnaJ</i>      | Chaperone protein DnaJ                                     | + | + |
| 166 | Q81LS4 | <i>prmA</i>      | Ribosomal protein L11 methyltransferase                    | + | + |
| 167 | Q81LS5 | <i>rsmE</i>      | Ribosomal RNA small subunit methyltransferase E            | - | + |
| 168 | Q81LT6 | <i>cdd2</i>      | Cytidine deaminase                                         | + | + |
| 169 | Q81LT7 | <i>era</i>       | GTPase Era                                                 | + | + |
| 170 | Q81LU0 | <i>GBAA_4521</i> | CBS domain protein                                         | - | + |
| 171 | Q81LU1 | <i>BA_4520</i>   | Putative pyruvate, phosphate dikinase regulatory protein   | + | + |
| 172 | Q81LU5 | <i>sigA</i>      | RNA polymerase sigma factor                                | + | + |
| 173 | Q81LU6 | <i>cccA</i>      | Cytochrome c-550                                           | + | + |
| 174 | Q81LV0 | <i>cshB</i>      | ATP-dependent RNA helicase, DEAD/DEAH box family           | + | + |
| 175 | Q81LV1 | <i>nfo</i>       | Probable endonuclease 4                                    | - | + |
| 176 | Q81LW0 | <i>sodA1</i>     | Superoxide dismutase [Mn] 1                                | + | + |
| 177 | Q81LX2 | <i>glcK</i>      | Glucokinase                                                | + | + |
| 178 | Q81M04 | <i>GBAA_4451</i> | Putative uncharacterized protein                           | + | - |
| 179 | Q81M06 | <i>gcvT</i>      | Aminomethyltransferase                                     | - | + |
| 180 | Q81M07 | <i>gcvPA</i>     | Probable glycine dehydrogenase [decarboxylating] subunit 1 | + | + |
| 181 | Q81M08 | <i>gcvPB</i>     | Probable glycine dehydrogenase [decarboxylating] subunit 2 | + | + |
| 182 | Q81M21 | <i>BA_4434</i>   | Transcriptional regulator, TetR family                     | - | + |
| 183 | Q81M23 | <i>GBAA_4432</i> | Rhodanese-like domain protein                              | + | + |
| 184 | Q81M33 | <i>pepQ1</i>     | Proline dipeptidase                                        | + | + |
| 185 | Q81M50 | <i>folD</i>      | Bifunctional protein FolD                                  | + | - |
| 186 | Q81M65 | <i>yqiS</i>      | Phosphate butyryltransferase                               | + | + |
| 187 | Q81M66 | <i>GBAA_4387</i> | Leucine dehydrogenase                                      | + | + |
| 188 | Q81M68 | <i>bfmbC</i>     | Dihydrolipoyl dehydrogenase                                | + | + |
| 189 | Q81M69 | <i>bfmbAa</i>    | 3-methyl-2-oxobutanoate dehydrogenase, alpha subunit       | + | + |
| 190 | Q81M70 | <i>bfmbAb</i>    | 3-methyl-2-oxobutanoate dehydrogenase, beta subunit        | + | + |
| 191 | Q81M71 | <i>bfmbB</i>     | Dihydrolipoamide acetyltransferase                         | + | + |
| 192 | Q81M74 | <i>BA_4378</i>   | UPF0403 protein BA_4378/GBAA_4378/BAS4061                  | + | + |
| 193 | Q81M84 | <i>GBAA_4368</i> | Peptidase T                                                | + | + |
| 194 | Q81MB5 | <i>ribH</i>      | 6,7-dimethyl-8-ribityllumazine synthase                    | - | + |
| 195 | Q81MD3 | <i>GBAA_4316</i> | MutT/nudix family protein                                  | - | + |
| 196 | Q81MD4 | <i>GBAA_4315</i> | Acetyltransferase, GNAT family                             | + | + |
| 197 | Q81MD8 | <i>xerD</i>      | Integrase/recombinase XerD                                 | - | + |
| 198 | Q81MD9 | <i>BA_4310</i>   | Putative lipoprotein                                       | + | + |
| 199 | Q81ME0 | <i>deoB</i>      | Phosphopentomutase                                         | + | + |
| 200 | Q81ME1 | <i>GBAA_4308</i> | Purine nucleoside phosphorylase                            | + | + |
| 201 | Q81ME2 | <i>pyn2</i>      | Pyrimidine-nucleoside phosphorylase                        | + | + |
| 202 | Q81MF3 | <i>spolIaA</i>   | Anti-sigma F factor antagonist                             | + | + |
| 203 | Q81MG1 | <i>GBAA_4288</i> | Stage V sporulation protein AD                             | + | + |
| 204 | Q81MG2 | <i>spoVAF</i>    | Stage V sporulation protein AF                             | + | - |
| 205 | Q81MG5 | <i>GBAA_4283</i> | Peptidyl-prolyl cis-trans isomerase                        | - | + |
| 206 | Q81MH4 | <i>nagA</i>      | N-acetylglucosamine-6-phosphate deacetylase                | + | + |

|     |        |                  |                                                                                 |   |   |
|-----|--------|------------------|---------------------------------------------------------------------------------|---|---|
| 207 | Q81MH5 | <i>nagB</i>      | Glucosamine-6-phosphate deaminase                                               | - | + |
| 208 | Q81MH6 | <i>phnF</i>      | Transcriptional regulator, GntR family                                          | + | - |
| 209 | Q81MH9 | <i>ptsG</i>      | PTS system, glucose-specific IIBC component                                     | + | - |
| 210 | Q81MI1 | <i>ptsI</i>      | Phosphoenolpyruvate-protein phosphotransferase                                  | + | + |
| 211 | Q81MI2 | <i>cot</i>       | Spore coat protein alpha                                                        | + | + |
| 212 | Q81MJ8 | <i>GBAA_4249</i> | Oxidoreductase, short-chain dehydrogenase/reductase family                      | + | - |
| 213 | Q81MK7 | <i>GBAA_4240</i> | Acetyl-CoA acetyltransferase                                                    | + | + |
| 214 | Q81ML7 | <i>GBAA_4230</i> | Alpha-amylase                                                                   | + | + |
| 215 | Q81ML8 | <i>GBAA_4229</i> | Maltosaccharide ABC transporter, maltosaccharide-binding protein                | + | + |
| 216 | Q81MM2 | <i>GBAA_4225</i> | Aminotransferase, class I/II                                                    | - | + |
| 217 | Q81MN8 | <i>GBAA_4209</i> | Ppx/GppA phosphatase family protein                                             | - | + |
| 218 | Q81MP2 | <i>GBAA_4204</i> | Oxidoreductase, short chain dehydrogenase/reductase family                      | + | + |
| 219 | Q81MQ2 | <i>dapH</i>      | 2,3,4,5-tetrahydropyridine-2,6-dicarboxylate N-acetyltransferase                | + | + |
| 220 | Q81MQ5 | <i>GBAA_4191</i> | Potassium uptake protein, TrkA family                                           | + | + |
| 221 | Q81MQ6 | <i>rnj</i>       | RNA-metabolising metallo-beta-lactamase family protein                          | + | + |
| 222 | Q81MQ8 | <i>GBAA_4188</i> | Hydrolase, haloacid dehalogenase-like family                                    | - | + |
| 223 | Q81MR1 | <i>pdhA</i>      | Pyruvate dehydrogenase complex E1 component, alpha subunit                      | + | + |
| 224 | Q81MR2 | <i>pdhB</i>      | Pyruvate dehydrogenase complex E1 component, beta subunit                       | + | + |
| 225 | Q81MR3 | <i>pdhC</i>      | Pyruvate dehydrogenase complex E2 component, dihydrolipoamide acetyltransferase | + | + |
| 226 | Q81MR4 | <i>pdhD</i>      | Dihydrolipoyl dehydrogenase                                                     | + | + |
| 227 | Q81MS8 | <i>typA</i>      | GTP-binding protein TypA                                                        | + | + |
| 228 | Q81MT6 | <i>pyc</i>       | Pyruvate carboxylase                                                            | + | + |
| 229 | Q81MT9 | <i>ctaC</i>      | Cytochrome c oxidase subunit 2                                                  | + | - |
| 230 | Q81MX0 | <i>GBAA_3450</i> | Glyoxalase family protein                                                       | - | + |
| 231 | Q81MX4 | <i>GBAA_3446</i> | Oxidoreductase, aldo/keto reductase family                                      | + | + |
| 232 | Q81MY6 | <i>zwf</i>       | Glucose-6-phosphate 1-dehydrogenase                                             | + | + |
| 233 | Q81MY7 | <i>tkt1</i>      | Transketolase                                                                   | + | + |
| 234 | Q81MY8 | <i>GBAA_3431</i> | 6-phosphogluconate dehydrogenase, decarboxylating                               | + | + |
| 235 | Q81MY9 | <i>tal2</i>      | Probable transaldolase 2                                                        | + | + |
| 236 | Q81MZ1 | <i>gntK</i>      | Gluconate kinase                                                                | - | + |
| 237 | Q81MZ2 | <i>GBAA_3427</i> | Putative uncharacterized protein                                                | + | + |
| 238 | Q81N35 | <i>pykA1</i>     | Pyruvate kinase                                                                 | + | + |
| 239 | Q81N37 | <i>GBAA_3380</i> | NAD(P)H-flavin oxidoreductase                                                   | + | + |
| 240 | Q81N95 | <i>GBAA_3320</i> | D-3-phosphoglycerate dehydrogenase, putative                                    | + | + |
| 241 | Q81NH4 | <i>cypD</i>      | Bifunctional P-450:NADPH-P450 reductase 1                                       | + | + |
| 242 | Q81NM4 | <i>GBAA_3164</i> | Catalase                                                                        | + | + |
| 243 | Q81NP6 | <i>GBAA_3134</i> | Catalase, Mn-containing                                                         | + | + |
| 244 | Q81NP8 | <i>GBAA_3131</i> | Alcohol dehydrogenase, zinc-containing                                          | + | + |
| 245 | Q81NQ0 | <i>GBAA_3129</i> | Putative uncharacterized protein                                                | + | + |
| 246 | Q81NQ1 | <i>GBAA_3128</i> | Putative uncharacterized protein                                                | + | - |
| 247 | Q81NX4 | <i>GBAA_3048</i> | ABC transporter, ATP-binding protein                                            | + | + |
| 248 | Q81P56 | <i>GBAA_2961</i> | Putative uncharacterized protein                                                | + | + |
| 249 | Q81P59 | <i>GBAA_2958</i> | Chorismate mutase/phospho-2-dehydro-3-deoxyheptonate aldolase                   | + | + |
| 250 | Q81P64 | <i>aroA</i>      | 3-phosphoshikimate 1-carboxyvinyltransferase                                    | + | + |
| 251 | Q81P66 | <i>GBAA_2951</i> | Transcriptional regulator, TetR family                                          | - | + |
| 252 | Q81P74 | <i>GBAA_2942</i> | Lipoprotein, putative                                                           | + | - |
| 253 | Q81PC5 | <i>BA_2886</i>   | Putative uncharacterized protein                                                | - | + |
| 254 | Q81PC7 | <i>GBAA_2883</i> | Lipoprotein, putative                                                           | + | - |

|     |        |                  |                                                                                                |   |   |
|-----|--------|------------------|------------------------------------------------------------------------------------------------|---|---|
| 255 | Q81PG5 | <i>GBAA_2841</i> | Putative uncharacterized protein                                                               | + | - |
| 256 | Q81PH9 | <i>ppaC</i>      | Probable manganese-dependent inorganic pyrophosphatase                                         | + | + |
| 257 | Q81PL5 | <i>GBAA_2787</i> | Glycine betaine/L-proline ABC transporter, glycine betaine/L-proline-binding protein, putative | + | + |
| 258 | Q81PL6 | <i>proV2</i>     | Glycine betaine/L-proline ABC transporter, ATP-binding protein                                 | + | + |
| 259 | Q81PQ3 | <i>sleB</i>      | Spore cortex-lytic enzyme prepeptide                                                           | + | + |
| 260 | Q81PQ4 | <i>ypeB</i>      | Germination protein YpeB                                                                       | + | - |
| 261 | Q81PQ5 | <i>GBAA_2746</i> | Lipoprotein, putative                                                                          | + | - |
| 262 | Q81PU1 | <i>GBAA_2705</i> | Endo/excinuclease amino terminal domain protein                                                | + | + |
| 263 | Q81QC9 | <i>pepD</i>      | Aminoacyl-histidine dipeptidase                                                                | - | + |
| 264 | Q81QF0 | <i>GBAA_2475</i> | ATP-dependent RNA helicase, DEAD/DEAH box family                                               | + | + |
| 265 | Q81QF6 | <i>tdcB</i>      | Threonine ammonia-lyase, catabolic                                                             | + | - |
| 266 | Q81QR5 | <i>iolA1</i>     | Methylmalonate semialdehyde dehydrogenase [acylating] 1                                        | + | + |
| 267 | Q81QR8 | <i>prpB</i>      | Carboxyvinyl-carboxyphosphonate phosphorylmutase                                               | + | + |
| 268 | Q81QS3 | <i>GBAA_2345</i> | Penicillin-binding protein 1A                                                                  | + | - |
| 269 | Q81QT5 | <i>GBAA_2332</i> | Putative uncharacterized protein                                                               | + | + |
| 270 | Q81QW5 | <i>kamA</i>      | L-lysine 2,3-aminomutase                                                                       | + | + |
| 271 | Q81QW7 | <i>GBAA_2298</i> | Acetyltransferase, GNAT family                                                                 | + | + |
| 272 | Q81QW8 | <i>GBAA_2297</i> | Peptidase, M20/M25/M40 family                                                                  | + | - |
| 273 | Q81QX6 | <i>GBAA_2289</i> | Aldehyde dehydrogenase family protein                                                          | + | + |
| 274 | Q81R09 | <i>asnO3</i>     | Asparagine synthetase                                                                          | + | + |
| 275 | Q81R11 | <i>GBAA_2249</i> | SCO1/SenC family lipoprotein                                                                   | + | - |
| 276 | Q81R22 | <i>dfrA</i>      | Dihydrofolate reductase                                                                        | - | + |
| 277 | Q81R75 | <i>ileS2</i>     | Isoleucine--tRNA ligase 2                                                                      | + | + |
| 278 | Q81R83 | <i>BA_2173</i>   | UPF0403 protein BA_2173/GBAA_2173/BAS2019                                                      | - | + |
| 279 | Q81RD2 | <i>GBAA_2117</i> | Metallo-beta-lactamase family protein                                                          | + | + |
| 280 | Q81RE0 | <i>GBAA_2109</i> | ATP-dependent RNA helicase, DEAD/DEAH box family                                               | + | + |
| 281 | Q81RE7 | <i>GBAA_2101</i> | Putative uncharacterized protein                                                               | + | + |
| 282 | Q81RG8 | <i>dal2</i>      | Alanine racemase                                                                               | - | + |
| 283 | Q81RK9 | <i>GBAA_2035</i> | Adhesion lipoprotein                                                                           | + | - |
| 284 | Q81RM3 | <i>GBAA_2019</i> | Acetyltransferase, GNAT family                                                                 | + | + |
| 285 | Q81RP3 | <i>nadE</i>      | NH(3)-dependent NAD(+) synthetase                                                              | + | + |
| 286 | Q81RT0 | <i>yoxD</i>      | Oxidoreductase, short-chain dehydrogenase/reductase family                                     | - | + |
| 287 | Q81RT6 | <i>BA_1951</i>   | Putative uncharacterized protein                                                               | + | + |
| 288 | Q81RW4 | <i>ldh1</i>      | L-lactate dehydrogenase 1                                                                      | + | + |
| 289 | Q81RX7 | <i>azoR2</i>     | FMN-dependent NADH-azoreductase 2                                                              | + | + |
| 290 | Q81S64 | <i>asnA</i>      | Aspartate--ammonia ligase                                                                      | - | + |
| 291 | Q81SK8 | <i>rnj</i>       | Metallo-beta-lactamase family protein                                                          | - | + |
| 292 | Q81SM2 | <i>GBAA_1626</i> | Conserved domain protein                                                                       | - | + |
| 293 | Q81SR2 | <i>GBAA_1584</i> | Putative uncharacterized protein                                                               | + | + |
| 294 | Q81SS7 | <i>aspB</i>      | Aspartate aminotransferase                                                                     | + | + |
| 295 | Q81ST0 | <i>dinG</i>      | DnaQ family exonuclease/DinG family helicase, putative                                         | - | + |
| 296 | Q81ST5 | <i>birA</i>      | Biotin operon repressor/biotin--[acetyl-CoA-carboxylase] ligase                                | - | + |
| 297 | Q81ST6 | <i>cca</i>       | CCA-adding enzyme                                                                              | - | + |
| 298 | Q81ST7 | <i>bshA</i>      | Glycosyl transferase, group 1 family protein                                                   | - | + |
| 299 | Q81SU0 | <i>dapB</i>      | Dihydrodipicolinate reductase                                                                  | + | + |
| 300 | Q81SV0 | <i>qcrB</i>      | Menaquinol-cytochrome c reductase, cytochrome b subunit                                        | + | - |
| 301 | Q81SV1 | <i>qcrA</i>      | Menaquinol-cytochrome c reductase, iron-sulfur subunit                                         | + | + |
| 302 | Q81SV8 | <i>ndk</i>       | Nucleoside diphosphate kinase                                                                  | + | + |
| 303 | Q81SW2 | <i>folE</i>      | GTP cyclohydrolase 1                                                                           | + | + |
| 304 | Q81SW9 | <i>der</i>       | GTPase Der                                                                                     | + | + |

|     |        |              |                                                                                  |   |   |
|-----|--------|--------------|----------------------------------------------------------------------------------|---|---|
| 305 | Q81SX1 | GBAA_1523    | Putative uncharacterized protein                                                 | + | + |
| 306 | Q81SX5 | <i>rpsA</i>  | Ribosomal protein S1                                                             | - | + |
| 307 | Q81SX8 | <i>ansA</i>  | L-asparaginase                                                                   | + | + |
| 308 | Q81SY3 | <i>gudB</i>  | Glutamate dehydrogenase                                                          | + | + |
| 309 | Q81SZ0 | <i>fer</i>   | Ferredoxin                                                                       | + | + |
| 310 | Q81SZ6 | <i>resD</i>  | DNA-binding response regulator ResD                                              | + | + |
| 311 | Q81SZ9 | <i>resA</i>  | Thiol-disulfide oxidoreductase ResA                                              | + | - |
| 312 | Q81T03 | GBAA_1489    | Superoxide dismutase                                                             | + | + |
| 313 | Q81T09 | <i>deoD</i>  | Purine nucleoside phosphorylase DeoD-type                                        | + | + |
| 314 | Q81T17 | GBAA_1474    | Penicillin-binding protein                                                       | + | - |
| 315 | Q81T18 | GBAA_1472    | Putative uncharacterized protein                                                 | + | + |
| 316 | Q81T23 | <i>hmp</i>   | Flavoheмоprotein                                                                 | + | + |
| 317 | Q81T61 | <i>hisB</i>  | Imidazoleglycerol-phosphate dehydratase                                          | - | + |
| 318 | Q81T67 | <i>leuB</i>  | 3-isopropylmalate dehydrogenase                                                  | - | + |
| 319 | Q81T77 | BA_1410      | Putative uncharacterized protein                                                 | + | + |
| 320 | Q81T97 | <i>dltA</i>  | D-alanine--poly(phosphoribitol) ligase subunit 1                                 | + | + |
| 321 | Q81TB4 | <i>nrdF</i>  | Ribonucleoside-diphosphate reductase subunit beta                                | + | + |
| 322 | Q81TB6 | <i>nrdE</i>  | Ribonucleoside-diphosphate reductase                                             | + | + |
| 323 | Q81TD1 | GBAA_1353    | Oligoendopeptidase F, putative                                                   | + | + |
| 324 | Q81TD2 | GBAA_1352    | Transcriptional regulator, MarR family                                           | - | + |
| 325 | Q81TH5 | <i>potD</i>  | Spermidine/putrescine ABC transporter, spermidine/putrescine-binding protein     | + | + |
| 326 | Q81TH8 | <i>potA</i>  | Spermidine/putrescine import ATP-binding protein PotA                            | + | - |
| 327 | Q81TK1 | <i>odhA</i>  | 2-oxoglutarate dehydrogenase E1 component                                        | - | + |
| 328 | Q81TK2 | <i>odhB</i>  | 2-oxoglutarate dehydrogenase, E2 component, dihydroliпоamide succinyltransferase | + | + |
| 329 | Q81TK8 | GBAA_1263    | Pyridine nucleotide-disulfide oxidoreductase, class I                            | + | + |
| 330 | Q81TN0 | BA_1241      | UPF0477 protein BA_1241/GBAA_1241/BAS1148                                        | + | + |
| 331 | Q81TN4 | <i>bxpB</i>  | Exosporium protein F                                                             | + | + |
| 332 | Q81TN7 | <i>cotZ1</i> | Exosporium protein Y                                                             | + | + |
| 333 | Q81TQ0 | <i>prpE</i>  | Bis(5'-nucleosyl)-tetraphosphatase PrpE [asymmetrical]                           | + | + |
| 334 | Q81TR0 | <i>pepF1</i> | Oligoendopeptidase F                                                             | + | + |
| 335 | Q81TS0 | GBAA_1195    | Oligopeptide ABC transporter, ATP-binding protein                                | + | + |
| 336 | Q81TS1 | GBAA_1194    | Oligopeptide ABC transporter, ATP-binding protein                                | + | - |
| 337 | Q81TS2 | GBAA_1193    | Oligopeptide ABC transporter, permease protein                                   | + | - |
| 338 | Q81TS3 | GBAA_1192    | Oligopeptide ABC transporter, permease protein                                   | + | - |
| 339 | Q81TT4 | <i>clpB</i>  | Chaperone protein ClpB                                                           | + | + |
| 340 | Q81TU3 | GBAA_1167    | Putative uncharacterized protein                                                 | + | + |
| 341 | Q81TV3 | <i>rocD</i>  | Ornithine aminotransferase                                                       | - | + |
| 342 | Q81U05 | GBAA_1089    | Lipoate-protein ligase A, putative                                               | + | + |
| 343 | Q81U14 | GBAA_1080    | Transcriptional regulator, TetR family                                           | - | + |
| 344 | Q81U40 | <i>ecsA</i>  | ABC transporter, ATP-binding protein EcsA                                        | + | - |
| 345 | Q81U45 | <i>prsA1</i> | Foldase protein PrsA 1                                                           | + | + |
| 346 | Q81U46 | GBAA_1040    | Helicase, UvrD/Rep family                                                        | + | + |
| 347 | Q81U58 | <i>glpK</i>  | Glycerol kinase                                                                  | + | + |
| 348 | Q81U68 | GBAA_1016    | Glyoxylase family protein                                                        | + | + |
| 349 | Q81U69 | GBAA_1015    | Glyoxalase family protein                                                        | + | + |
| 350 | Q81U72 | <i>yhaM</i>  | 3'-5' exoribonuclease YhaM                                                       | + | + |
| 351 | Q81UH5 | GBAA_0897    | Peptidase, family M20/M25/M40 protein                                            | + | + |
| 352 | Q81UL3 | GBAA_0855    | Amino acid ABC transporter, amino acid-binding protein                           | + | + |
| 353 | Q81UP1 | <i>murQ</i>  | N-acetylmuramic acid 6-phosphate etherase                                        | + | + |
| 354 | Q81UQ5 | <i>ku</i>    | Probable DNA repair protein BA_0808                                              | + | + |
| 355 | Q81UV8 | GBAA_0748    | Oxidoreductase, short chain dehydrogenase/reductase family                       | + | + |
| 356 | Q81V33 | <i>tal1</i>  | Probable transaldolase 1                                                         | + | + |

|     |        |                  |                                                                |   |   |
|-----|--------|------------------|----------------------------------------------------------------|---|---|
| 357 | Q81V34 | <i>rbsB</i>      | Ribose ABC transporter, ribose-binding protein                 | + | - |
| 358 | Q81V38 | <i>rbsK</i>      | Ribokinase                                                     | + | + |
| 359 | Q81V45 | <i>GBAA_0656</i> | Oligopeptide ABC transporter, oligopeptide-binding protein     | + | + |
| 360 | Q81V68 | <i>treC</i>      | Alpha, alpha-phosphotrehalase                                  | + | + |
| 361 | Q81V80 | <i>BA_0620</i>   | Putative pyridoxal phosphate-dependent acyltransferase         | + | - |
| 362 | Q81V85 | <i>GBAA_0615</i> | Iron compound ABC transporter, iron compound-binding protein   | + | + |
| 363 | Q81V90 | <i>aspA1</i>     | Fumarate hydratase class II                                    | + | + |
| 364 | Q81V91 | <i>GBAA_0608</i> | CBS domain protein                                             | + | + |
| 365 | Q81V97 | <i>GBAA_0602</i> | Putative lipoprotein                                           | + | + |
| 366 | Q81VA2 | <i>GBAA_0596</i> | Nicotinate phosphoribosyltransferase                           | + | + |
| 367 | Q81VA3 | <i>GBAA_0595</i> | Heavy metal-transporting ATPase                                | + | - |
| 368 | Q81VB4 | <i>GBAA_0583</i> | Acetyltransferase, GNAT family                                 | + | + |
| 369 | Q81VE0 | <i>guaA</i>      | GMP synthase [glutamine-hydrolyzing]                           | + | + |
| 370 | Q81VE1 | <i>groL</i>      | 60 kDa chaperonin                                              | + | + |
| 371 | Q81VE5 | <i>rex</i>       | Redox-sensing transcriptional repressor rex                    | + | - |
| 372 | Q81VE9 | <i>GBAA_0259</i> | Putative uncharacterized protein                               | + | + |
| 373 | Q81VF0 | <i>GBAA_0258</i> | ATPase, YjeE family                                            | - | + |
| 374 | Q81VF3 | <i>GBAA_0255</i> | S1 RNA binding domain protein                                  | + | + |
| 375 | Q81VF6 | <i>dal1</i>      | Alanine racemase                                               | + | + |
| 376 | Q81VG0 | <i>cshA</i>      | DEAD-box ATP-dependent RNA helicase CshA                       | + | + |
| 377 | Q81VK1 | <i>GBAA_0196</i> | Oxidoreductase, aldo/keto reductase family                     | + | + |
| 378 | Q81VK7 | <i>GBAA_0190</i> | Lipoprotein, putative                                          | + | + |
| 379 | Q81VN1 | <i>yqjI</i>      | 6-phosphogluconate dehydrogenase, decarboxylating              | + | + |
| 380 | Q81VN5 | <i>glmS</i>      | Glutamine--fructose-6-phosphate aminotransferase [isomerizing] | + | + |
| 381 | Q81VN7 | <i>glmM</i>      | Phosphoglucosamine mutase                                      | + | + |
| 382 | Q81VP0 | <i>rocF</i>      | Arginase                                                       | + | + |
| 383 | Q81VP4 | <i>gerD</i>      | Spore germination protein GerD                                 | + | - |
| 384 | Q81VP8 | <i>rpsI</i>      | 30S ribosomal protein S9                                       | + | + |
| 385 | Q81VP9 | <i>rplM</i>      | 50S ribosomal protein L13                                      | + | + |
| 386 | Q81VQ3 | <i>rplQ</i>      | 50S ribosomal protein L17                                      | + | + |
| 387 | Q81VQ4 | <i>rpoA</i>      | DNA-directed RNA polymerase subunit alpha                      | + | + |
| 388 | Q81VQ5 | <i>rpsK</i>      | 30S ribosomal protein S11                                      | + | + |
| 389 | Q81VQ9 | <i>adk</i>       | Adenylate kinase                                               | - | + |
| 390 | Q81VR0 | <i>secY1</i>     | Protein translocase subunit SecY                               | + | - |
| 391 | Q81VR1 | <i>rplO</i>      | 50S ribosomal protein L15                                      | + | + |
| 392 | Q81VR3 | <i>rpsE</i>      | 30S ribosomal protein S5                                       | + | + |
| 393 | Q81VR4 | <i>rplR</i>      | 50S ribosomal protein L18                                      | + | + |
| 394 | Q81VR5 | <i>rplF</i>      | 50S ribosomal protein L6                                       | + | + |
| 395 | Q81VR6 | <i>rpsH</i>      | 30S ribosomal protein S8                                       | + | + |
| 396 | Q81VR8 | <i>rplE</i>      | 50S ribosomal protein L5                                       | + | + |
| 397 | Q81VR9 | <i>rplX</i>      | 50S ribosomal protein L24                                      | + | + |
| 398 | Q81VS0 | <i>rplN</i>      | 50S ribosomal protein L14                                      | + | + |
| 399 | Q81VS1 | <i>rpsQ</i>      | 30S ribosomal protein S17                                      | + | + |
| 400 | Q81VS3 | <i>rplP</i>      | 50S ribosomal protein L16                                      | + | + |
| 401 | Q81VS4 | <i>rpsC</i>      | 30S ribosomal protein S3                                       | + | + |
| 402 | Q81VS5 | <i>rplV</i>      | 50S ribosomal protein L22                                      | + | + |
| 403 | Q81VS7 | <i>rplB</i>      | 50S ribosomal protein L2                                       | + | + |
| 404 | Q81VS9 | <i>rplD</i>      | 50S ribosomal protein L4                                       | + | + |
| 405 | Q81VT0 | <i>rplC</i>      | 50S ribosomal protein L3                                       | + | + |
| 406 | Q81VT2 | <i>tuf</i>       | Elongation factor Tu                                           | + | + |
| 407 | Q81VT3 | <i>fusA</i>      | Elongation factor G                                            | + | + |
| 408 | Q81VT4 | <i>rpsG</i>      | 30S ribosomal protein S7                                       | + | + |



|     |        |                  |                                                                       |   |   |
|-----|--------|------------------|-----------------------------------------------------------------------|---|---|
| 409 | Q81VT5 | <i>rpsL</i>      | 30S ribosomal protein S12                                             | + | + |
| 410 | Q81VT8 | <i>rpoB</i>      | DNA-directed RNA polymerase subunit beta                              | + | + |
| 411 | Q81VT9 | <i>GBAA_0101</i> | YbxB protein                                                          | + | + |
| 412 | Q81VU1 | <i>rplJ</i>      | 50S ribosomal protein L10                                             | + | + |
| 413 | Q81VU2 | <i>rplA</i>      | 50S ribosomal protein L1                                              | + | + |
| 414 | Q81VU3 | <i>rplK</i>      | 50S ribosomal protein L11                                             | + | + |
| 415 | Q81VU9 | <i>GBAA_0091</i> | RNA methyltransferase, TrmH family, group 3                           | + | + |
| 416 | Q81VV1 | <i>cysS</i>      | Cysteine--tRNA ligase                                                 | + | + |
| 417 | Q81VV3 | <i>gltX</i>      | Glutamate--tRNA ligase                                                | + | + |
| 418 | Q81VV5 | <i>ispD</i>      | 2-C-methyl-D-erythritol 4-phosphate cytidyltransferase                | - | + |
| 419 | Q81VV7 | <i>disA</i>      | DNA integrity scanning protein DisA                                   | + | + |
| 420 | Q81VV8 | <i>radA</i>      | DNA repair protein radA                                               | - | + |
| 421 | Q81VV9 | <i>GBAA_0080</i> | Negative regulator of genetic competence ClpC/MecB                    | + | + |
| 422 | Q81VW0 | <i>mcsB</i>      | Putative ATP:guanido phosphotransferase                               | + | + |
| 423 | Q81VW3 | <i>lysS</i>      | Lysine--tRNA ligase                                                   | + | + |
| 424 | Q81VX2 | <i>cysK1</i>     | Cysteine synthase                                                     | + | + |
| 425 | Q81VX3 | <i>hsI</i>       | 33 kDa chaperonin                                                     | + | + |
| 426 | Q81VX4 | <i>coaX</i>      | Type III pantothenate kinase                                          | - | + |
| 427 | Q81VX5 | <i>ftsH</i>      | ATP-dependent zinc metalloprotease FtsH                               | + | + |
| 428 | Q81VX6 | <i>hpt</i>       | Hypoxanthine phosphoribosyltransferase                                | + | + |
| 429 | Q81VY4 | <i>GBAA_0055</i> | Tetrapyrrole methylase family protein/MazG family protein             | + | + |
| 430 | Q81VY6 | <i>spoVT</i>     | Stage V sporulation protein T                                         | + | + |
| 431 | Q81VY7 | <i>mfd</i>       | Transcription-repair coupling factor                                  | + | + |
| 432 | Q81VY9 | <i>pth</i>       | Peptidyl-tRNA hydrolase                                               | + | + |
| 433 | Q81VZ0 | <i>prs</i>       | Ribose-phosphate pyrophosphokinase                                    | + | + |
| 434 | Q81VZ1 | <i>glmU</i>      | Bifunctional protein GlmU                                             | - | + |
| 435 | Q81VZ5 | <i>purR</i>      | Pur operon repressor                                                  | + | + |
| 436 | Q81VZ6 | <i>ispE</i>      | 4-diphosphocytidyl-2-C-methyl-D-erythritol kinase                     | - | + |
| 437 | Q81VZ8 | <i>GBAA_0041</i> | Veg protein                                                           | + | + |
| 438 | Q81W00 | <i>rsmA</i>      | Ribosomal RNA small subunit methyltransferase A                       | + | + |
| 439 | Q81W03 | <i>metG1</i>     | Methionine--tRNA ligase 1                                             | + | + |
| 440 | Q81W11 | <i>tmk</i>       | Thymidylate kinase                                                    | + | + |
| 441 | Q81W23 | <i>GBAA_0014</i> | Deoxynucleoside kinase family protein                                 | - | + |
| 442 | Q81W24 | <i>GBAA_0013</i> | Putative uncharacterized protein                                      | - | + |
| 443 | Q81W25 | <i>serS</i>      | Serine--tRNA ligase                                                   | + | + |
| 444 | Q81W27 | <i>pdxS</i>      | Pyridoxal biosynthesis lyase PdxS                                     | + | + |
| 445 | Q81W29 | <i>guaB</i>      | Inosine-5'-monophosphate dehydrogenase                                | + | + |
| 446 | Q81W30 | <i>gyrA</i>      | DNA gyrase subunit A                                                  | + | + |
| 447 | Q81W34 | <i>dnaN1</i>     | DNA polymerase III subunit beta                                       | + | + |
| 448 | Q81W35 | <i>dnaA</i>      | Chromosomal replication initiator protein DnaA                        | + | + |
| 449 | Q81W42 | <i>GBAA_4140</i> | Methyltransferase, putative                                           | - | + |
| 450 | Q81W43 | <i>coaD</i>      | Phosphopantetheine adenylyltransferase                                | - | + |
| 451 | Q81W46 | <i>GBAA_4136</i> | PDZ domain protein                                                    | + | - |
| 452 | Q81W47 | <i>BA_4135</i>   | UPF0348 protein BA_4135/GBAA_4135/BAS3837                             | + | + |
| 453 | Q81WB7 | <i>GBAA_4063</i> | Putative uncharacterized protein                                      | + | - |
| 454 | Q81WC2 | <i>bshC</i>      | UPF0747 protein BA_4058/GBAA_4058/BAS3770                             | + | + |
| 455 | Q81WC3 | <i>rsmH</i>      | Ribosomal RNA small subunit methyltransferase H                       | + | + |
| 456 | Q81WC7 | <i>murE</i>      | UDP-N-acetylmuramoyl-L-alanyl-D-glutamate--2,6-diaminopimelate ligase | + | + |
| 457 | Q81WD3 | <i>ftsA</i>      | Cell division protein ftsA                                            | + | - |
| 458 | Q81WD6 | <i>sigG</i>      | RNA polymerase sigma factor                                           | + | - |
| 459 | Q81WE4 | <i>ileS1</i>     | Isoleucine--tRNA ligase 1                                             | + | + |
| 460 | Q81WE7 | <i>pyrR</i>      | Bifunctional protein PyrR                                             | + | + |
| 461 | Q81WG3 | <i>GBAA_4013</i> | Fibronectin/fibrinogen-binding protein, putative                      | + | + |

|     |        |                  |                                                                     |   |   |
|-----|--------|------------------|---------------------------------------------------------------------|---|---|
| 462 | Q81WG7 | <i>gmk</i>       | Guanylate kinase                                                    | + | + |
| 463 | Q81WH2 | <i>fmt</i>       | Methionyl-tRNA formyltransferase                                    | + | + |
| 464 | Q81WH3 | <i>sun</i>       | Ribosomal RNA small subunit methyltransferase B                     | - | + |
| 465 | Q81WH4 | <i>rlmN</i>      | Probable dual-specificity RNA methyltransferase RlmN                | + | + |
| 466 | Q81WH7 | <i>rsgA</i>      | Putative ribosome biogenesis GTPase RsgA                            | + | + |
| 467 | Q81WH8 | <i>rpe</i>       | Ribulose-phosphate 3-epimerase                                      | - | + |
| 468 | Q81WI2 | <i>GBAA_3994</i> | Phosphatase, putative                                               | + | + |
| 469 | Q81WI5 | <i>plsX</i>      | Phosphate acyltransferase                                           | + | + |
| 470 | Q81WI7 | <i>acpP</i>      | Acyl carrier protein                                                | - | + |
| 471 | Q81WI8 | <i>rnc</i>       | Ribonuclease 3                                                      | - | + |
| 472 | Q81WJ2 | <i>ffH</i>       | Signal recognition particle protein                                 | + | - |
| 473 | Q81WJ5 | <i>rimM</i>      | Ribosome maturation factor RimM                                     | - | + |
| 474 | Q81WJ6 | <i>rpIS</i>      | 50S ribosomal protein L19                                           | + | + |
| 475 | Q81WJ7 | <i>sipS2</i>     | Signal peptidase I                                                  | + | - |
| 476 | Q81WK0 | <i>sucC</i>      | Succinyl-CoA ligase [ADP-forming] subunit beta                      | + | + |
| 477 | Q81WK1 | <i>sucD</i>      | Succinyl-CoA ligase [ADP-forming] subunit alpha                     | + | - |
| 478 | Q81WK2 | <i>topA</i>      | DNA topoisomerase                                                   | + | + |
| 479 | Q81WK3 | <i>tmFO</i>      | Methylenetetrahydrofolate--tRNA-(uracil-5-)-methyltransferase TrmFO | + | + |
| 480 | Q81WK5 | <i>hslV</i>      | ATP-dependent protease subunit HslV                                 | + | + |
| 481 | Q81WK6 | <i>hslU</i>      | ATP-dependent protease ATPase subunit HslU                          | + | + |
| 482 | Q81WK7 | <i>codY</i>      | GTP-sensing transcriptional pleiotropic repressor CodY              | + | + |
| 483 | Q81WK8 | <i>rpsB</i>      | 30S ribosomal protein S2                                            | + | + |
| 484 | Q81WK9 | <i>tsf</i>       | Elongation factor Ts                                                | + | + |
| 485 | Q81WL0 | <i>pyrH</i>      | Uridylate kinase                                                    | + | + |
| 486 | Q81WL4 | <i>dxr2</i>      | 1-deoxy-D-xylulose 5-phosphate reductoisomerase 2                   | + | + |
| 487 | Q81WL5 | <i>rasP</i>      | Membrane-associated zinc metalloprotease, putative                  | + | - |
| 488 | Q81WL6 | <i>proS1</i>     | Proline--tRNA ligase 1                                              | + | + |
| 489 | Q81WL9 | <i>rimP</i>      | Ribosome maturation factor RimP                                     | - | + |
| 490 | Q81WM0 | <i>nusA</i>      | N utilization substance protein A                                   | + | + |
| 491 | Q81WM3 | <i>infB</i>      | Translation initiation factor IF-2                                  | + | + |
| 492 | Q81WM8 | <i>pnp</i>       | Polyribonucleotide nucleotidyltransferase                           | + | + |
| 493 | Q81WN0 | <i>GBAA_3942</i> | Zinc protease, insulinase family                                    | + | + |
| 494 | Q81WN5 | <i>asd2</i>      | Aspartate-semialdehyde dehydrogenase                                | + | + |
| 495 | Q81WN9 | <i>rnj</i>       | Metallo-beta-lactamase family protein                               | + | + |
| 496 | Q81WP0 | <i>clpP</i>      | Clp protease                                                        | + | + |
| 497 | Q81WP4 | <i>GBAA_3927</i> | Lipoprotein, Bmp family                                             | + | + |
| 498 | Q81WP6 | <i>GBAA_3923</i> | Putative uncharacterized protein                                    | + | + |
| 499 | Q81WP7 | <i>GBAA_3922</i> | Zinc protease, insulinase family                                    | + | + |
| 500 | Q81WQ1 | <i>GBAA_3918</i> | Putative uncharacterized protein                                    | + | + |
| 501 | Q81WQ4 | <i>rny</i>       | Ribonuclease Y                                                      | + | + |
| 502 | Q81WQ5 | <i>GBAA_3913</i> | Metallophosphoesterase, MG_246/BB_0505 family                       | + | + |
| 503 | Q81WQ7 | <i>GBAA_3911</i> | Renal dipeptidase family protein                                    | - | + |
| 504 | Q81WQ8 | <i>GBAA_3910</i> | Putative pyruvate ferredoxin oxidoreductase, alpha subunit          | + | + |
| 505 | Q81WQ9 | <i>GBAA_3909</i> | Putative pyruvate ferredoxin oxidoreductase, beta subunit           | + | + |
| 506 | Q81WR2 | <i>cotE</i>      | Spore coat protein E                                                | + | + |
| 507 | Q81WR3 | <i>mutS</i>      | DNA mismatch repair protein MutS                                    | - | + |
| 508 | Q81WU4 | <i>pepT</i>      | Peptidase T                                                         | - | + |
| 509 | Q81WX8 | <i>GBAA_3835</i> | Aluminum resistance protein                                         | + | - |
| 510 | Q81WZ0 | <i>cydA3</i>     | Cytochrome d ubiquinol oxidase, subunit I                           | + | + |
| 511 | Q81X16 | <i>GBAA_5433</i> | UDP-N-acetylglucosamine 2-epimerase                                 | + | + |
| 512 | Q81X26 | <i>secA1</i>     | Protein translocase subunit SecA 1                                  | + | + |
| 513 | Q81X47 | <i>uvrB</i>      | UvrABC system protein B                                             | - | + |
| 514 | Q81X48 | <i>uvrA</i>      | UvrABC system protein A                                             | + | + |

|     |        |                  |                                                                 |   |   |
|-----|--------|------------------|-----------------------------------------------------------------|---|---|
| 515 | Q81X56 | <i>trxB</i>      | Thioredoxin reductase                                           | + | + |
| 516 | Q81X58 | <i>GBAA_5385</i> | MutT/nudix family protein                                       | + | + |
| 517 | Q81X59 | <i>BA_5384</i>   | UPF0042 nucleotide-binding protein<br>BA_5384/GBAA_5384/BAS5004 | + | + |
| 518 | Q81X63 | <i>clpP2</i>     | ATP-dependent Clp protease proteolytic subunit 2                | + | + |
| 519 | Q81X64 | <i>GBAA_5379</i> | Putative uncharacterized protein                                | + | + |
| 520 | Q81X67 | <i>GBAA_5376</i> | Stage V sporulation protein AD                                  | + | + |
| 521 | Q81X68 | <i>GBAA_5375</i> | SpoVA family protein                                            | + | - |
| 522 | Q81X69 | <i>GBAA_5374</i> | Putative lipoprotein                                            | - | + |
| 523 | Q81X74 | <i>gap2</i>      | Glyceraldehyde 3-phosphate dehydrogenase                        | + | + |
| 524 | Q81X75 | <i>pgk</i>       | Phosphoglycerate kinase                                         | + | + |
| 525 | Q81X76 | <i>tpiA</i>      | Triosephosphate isomerase                                       | + | + |
| 526 | Q81X77 | <i>gpml</i>      | 2,3-bisphosphoglycerate-independent phosphoglycerate mutase     | + | + |
| 527 | Q81X78 | <i>eno</i>       | Enolase                                                         | + | + |
| 528 | Q81XA5 | <i>estA</i>      | Carboxylesterase                                                | + | + |
| 529 | Q81XA6 | <i>vacB</i>      | Ribonuclease R                                                  | + | + |
| 530 | Q81XB0 | <i>GBAA_5330</i> | Iron compound ABC transporter, iron compound-binding protein    | + | - |
| 531 | Q81XC6 | <i>tyrS2</i>     | Tyrosine--tRNA ligase 2                                         | + | + |
| 532 | Q81XC7 | <i>GBAA_5313</i> | Pyridine nucleotide-disulphide oxidoreductase                   | + | + |
| 533 | Q81XD1 | <i>GBAA_5308</i> | Oxidoreductase, aldo/keto reductase family                      | - | + |
| 534 | Q81XK0 | <i>GBAA_5237</i> | Lipoprotein, putative                                           | + | - |
| 535 | Q81XL5 | <i>GBAA_5220</i> | Lipoprotein                                                     | + | - |
| 536 | Q81XL7 | <i>sufC</i>      | ABC transporter, ATP-binding protein                            | + | + |
| 537 | Q81XL8 | <i>sufD</i>      | FeS assembly protein SufD                                       | + | + |
| 538 | Q81XL9 | <i>sufS</i>      | Cysteine desulfurase                                            | + | + |
| 539 | Q81XM1 | <i>sufB</i>      | FeS assembly protein SufB                                       | + | + |
| 540 | Q81XM8 | <i>lipA</i>      | Lipoyl synthase                                                 | - | + |
| 541 | Q81XN4 | <i>GBAA_5199</i> | Lipoprotein, putative                                           | + | - |
| 542 | Q81XP1 | <i>GBAA_5192</i> | Phosphatase,haloacid dehalogenase family                        | + | - |
| 543 | Q81XS0 | <i>BA_5160</i>   | Ferredoxin--NADP reductase 2                                    | + | + |
| 544 | Q81XS1 | <i>GBAA_5159</i> | Pyridine nucleotide-disulphide oxidoreductase                   | + | + |
| 545 | Q81XS5 | <i>pepA</i>      | Probable cytosol aminopeptidase                                 | + | - |
| 546 | Q81XS6 | <i>dacB</i>      | Putative uncharacterized protein                                | - | + |
| 547 | Q81XS7 | <i>GBAA_5153</i> | Phosphoglucomutase/phosphomannomutase family protein            | + | + |
| 548 | Q81XS8 | <i>gtab</i>      | UTP--glucose-1-phosphate uridylyltransferase                    | + | + |
| 549 | Q81XT3 | <i>glyQS</i>     | Glycine--tRNA ligase                                            | + | + |
| 550 | Q81XT6 | <i>glnA</i>      | Glutamine synthetase                                            | + | + |
| 551 | Q81XW2 | <i>GBAA_3805</i> | Prophage LambdaBa01, acyltransferase, putative                  | - | + |
| 552 | Q81Y15 | <i>tkt2</i>      | Transketolase                                                   | + | + |
| 553 | Q81Y17 | <i>BA_3742</i>   | UPF0154 protein BA_3742/GBAA_3742/BAS3468                       | + | + |
| 554 | Q81Y80 | <i>acnA</i>      | Aconitate hydratase 1                                           | - | + |
| 555 | Q81Y89 | <i>GBAA_3668</i> | Glycosyl hydrolase, family 18                                   | + | + |
| 556 | Q81Y92 | <i>plsY3</i>     | Glycerol-3-phosphate acyltransferase 3                          | + | - |
| 557 | Q81Y99 | <i>parC</i>      | DNA topoisomerase IV, A subunit                                 | - | + |
| 558 | Q81YA0 | <i>GBAA_3655</i> | Oxidoreductase, Gfo/Idh/MocA family                             | + | + |
| 559 | Q81YI0 | <i>BA_3567</i>   | UPF0061 protein BA_3567/GBAA_3567/BAS3307                       | + | + |
| 560 | Q81YK3 | <i>GBAA_3539</i> | Putative uncharacterized protein                                | + | + |
| 561 | Q81YL7 | <i>GBAA_3524</i> | Putative uncharacterized protein                                | - | + |
| 562 | Q81YT5 | <i>GBAA_0547</i> | Putative tRNA (cytidine(34)-2'-O)-methyltransferase             | + | + |
| 563 | Q81YT8 | <i>bdbD</i>      | Probable disulfide bond formation protein D                     | + | - |
| 564 | Q81YU4 | <i>GBAA_0537</i> | Transcriptional regulator, Fur family                           | - | + |
| 565 | Q81YV0 | <i>hemL1</i>     | Glutamate-1-semialdehyde 2,1-aminomutase 1                      | + | + |
| 566 | Q81YX6 | <i>GBAA_0503</i> | Putative uncharacterized protein                                | - | + |

|     |        |                       |                                                                    |   |   |
|-----|--------|-----------------------|--------------------------------------------------------------------|---|---|
| 567 | Q81Z48 | <i>BA_0426</i>        | Uncharacterized RNA methyltransferase<br>BA_0426/GBAA_0426/BAS0414 | + | - |
| 568 | Q81Z55 | <i>GBAA_0418</i>      | General stress protein 26                                          | + | + |
| 569 | Q81Z71 | <i>GBAA_0401</i>      | Tellurium resistance protein                                       | + | + |
| 570 | Q81Z72 | <i>GBAA_0400</i>      | Tellurium resistance protein                                       | + | + |
| 571 | Q81Z90 | <i>GBAA_0382</i>      | ABC transporter, substrate-binding protein, putative               | + | - |
| 572 | Q81Z98 | <i>GBAA_0374</i>      | Conserved domain protein                                           | + | - |
| 573 | Q81ZA6 | <i>GBAA_0365</i>      | Putative Rieske 2Fe-2S iron-sulfur protein                         | + | + |
| 574 | Q81ZB0 | <i>GBAA_0361</i>      | Putative cyclase                                                   | - | + |
| 575 | Q81ZB8 | <i>GBAA_0351</i>      | Iron compound ABC transporter, iron compound-binding protein       | + | - |
| 576 | Q81ZC2 | <i>mtnA1</i>          | Methylthioribose-1-phosphate isomerase 1                           | - | + |
| 577 | Q81ZC4 | <i>ahpC</i>           | Alkyl hydroperoxide reductase, subunit C                           | + | + |
| 578 | Q81ZC5 | <i>ahpF</i>           | Alkyl hydroperoxide reductase, F subunit                           | + | + |
| 579 | Q81ZE0 | <i>ampS</i>           | Aminopeptidase AmpS                                                | + | - |
| 580 | Q81ZE6 | <i>GBAA_0323</i>      | Putative uncharacterized protein                                   | + | + |
| 581 | Q81ZE7 | <i>gatB</i>           | Aspartyl/glutamyl-tRNA(Asn/Gln) amidotransferase subunit B         | + | + |
| 582 | Q81ZE8 | <i>gatA</i>           | Glutamyl-tRNA(Gln) amidotransferase subunit A                      | + | + |
| 583 | Q81ZF8 | <i>rocA</i>           | 1-pyrroline-5-carboxylate dehydrogenase                            | + | + |
| 584 | Q81ZG1 | <i>ligA</i>           | DNA ligase                                                         | + | + |
| 585 | Q81ZG2 | <i>pcrA</i>           | ATP-dependent DNA helicase PcrA                                    | + | + |
| 586 | Q81ZG4 | <i>GBAA_0302</i>      | Putative uncharacterized protein                                   | + | + |
| 587 | Q81ZH6 | <i>purB</i>           | Adenylosuccinate lyase                                             | + | + |
| 588 | Q8RPQ1 | <i>dps1</i>           | DNA protection during starvation protein 1                         | + | + |
| 589 | Q8RPQ2 | <i>dps2</i>           | DNA protection during starvation protein 2                         | + | + |
| 590 | Q9APZ2 | <i>recA</i>           | Protein RecA                                                       | + | + |
| 591 | Q9X315 | <i>repX</i>           | Plasmid replication protein RepX                                   | + | + |
| 592 | Q9X388 | <i>GBAA_pXO1_0199</i> | PXO1-131O1_0199                                                    | + | + |
| 593 | Q9X3Y6 | <i>gyrB</i>           | DNA gyrase subunit B                                               | + | + |

<sup>a</sup> Sample was detected in dormant spores.

<sup>b</sup> Sample was detected in germinated spores

**Supplemental Table S2. All *B. subtilis* proteins identified**

| N  | Uniprot accession | Gene name   | Function                                                        | Dor <sup>a</sup> | Germ <sup>b</sup> |
|----|-------------------|-------------|-----------------------------------------------------------------|------------------|-------------------|
| 1  | C0SP90            | <i>ythA</i> | Cytochrome d ubiquinol oxidase subunit 1-like protein           | +                | +                 |
| 2  | C0SP93            | <i>accD</i> | Acetyl-coenzyme A carboxylase carboxyl transferase subunit beta | -                | +                 |
| 3  | C0SP94            | <i>yhfQ</i> | Putative ABC transporter substrate-binding lipoprotein          | +                | +                 |
| 4  | C0SPB0            | <i>ytcl</i> | Uncharacterized acyl-CoA ligase Ytcl                            | +                | +                 |
| 5  | O05235            | <i>yugF</i> | Uncharacterized hydrolase yugF                                  | -                | +                 |
| 6  | O05239            | <i>yugJ</i> | Probable NADH-dependent butanol dehydrogenase 1                 | +                | +                 |
| 7  | O05240            | <i>yugK</i> | Probable NADH-dependent butanol dehydrogenase 2                 | +                | +                 |
| 8  | O05241            | <i>yugS</i> | UPF0053 protein yugS                                            | +                | +                 |
| 9  | O05248            | <i>yugP</i> | Putative membrane protease yugP                                 | +                | +                 |
| 10 | O05267            | <i>yumB</i> | NADH dehydrogenase-like protein yumB                            | +                | +                 |
| 11 | O05268            | <i>yumC</i> | Ferredoxin--NADP reductase 2                                    | +                | +                 |
| 12 | O05495            | <i>ydhD</i> | Putative sporulation-specific glycosylase ydhD                  | -                | +                 |
| 13 | O05508            | <i>gmuD</i> | 6-phospho-beta-glucosidase gmuD                                 | +                | +                 |
| 14 | O05516            | <i>tsaB</i> | Uncharacterized protein YdiC                                    | +                | +                 |
| 15 | O05521            | <i>rex</i>  | Redox-sensing transcriptional repressor rex                     | +                | +                 |
| 16 | O06012            | <i>adhB</i> | Uncharacterized zinc-type alcohol dehydrogenase-like protein    | +                | +                 |
| 17 | O06478            | <i>yfmT</i> | Putative aldehyde dehydrogenase yfmT                            | +                | +                 |
| 18 | O06491            | <i>gatA</i> | Glutamyl-tRNA(Gln) amidotransferase subunit A                   | +                | +                 |
| 19 | O06741            | <i>yitF</i> | Putative isomerase yitF                                         | +                | +                 |
| 20 | O06747            | <i>yitL</i> | Uncharacterized protein yitL                                    | -                | +                 |
| 21 | O06965            | <i>yvcA</i> | Putative lipoprotein yvcA                                       | +                | -                 |
| 22 | O06973            | <i>yvcJ</i> | UPF0042 nucleotide-binding protein yvcJ                         | +                | +                 |
| 23 | O06975            | <i>whiA</i> | Putative sporulation transcription regulator whiA               | -                | +                 |
| 24 | O06986            | <i>yvdD</i> | LOG family protein yvdD                                         | +                | -                 |
| 25 | O06988            | <i>bbmA</i> | Intracellular maltogenic amylase                                | -                | +                 |
| 26 | O06993            | <i>mdxK</i> | Uncharacterized glycosyl hydrolase yvdK                         | +                | +                 |
| 27 | O06994            | <i>malL</i> | Oligo-1,6-glucosidase 1                                         | +                | +                 |
| 28 | O07001            | <i>yvdT</i> | Uncharacterized HTH-type transcriptional regulator yvdT         | +                | +                 |
| 29 | O07002            | <i>yveA</i> | Aspartate-proton symporter                                      | +                | +                 |
| 30 | O07513            | <i>hit</i>  | Protein hit                                                     | +                | +                 |
| 31 | O07533            | <i>yhaR</i> | Putative enoyl-CoA hydratase/isomerase yhaR                     | +                | +                 |
| 32 | O07543            | <i>yheB</i> | UPF0754 membrane protein yheB                                   | +                | +                 |
| 33 | O07581            | <i>yhdL</i> | Probable anti-sigma-M factor yhdL                               | +                | -                 |
| 34 | O07584            | <i>plsC</i> | 1-acyl-sn-glycerol-3-phosphate acyltransferase                  | +                | +                 |
| 35 | O07595            | <i>cobB</i> | NAD-dependent deacetylase                                       | +                | +                 |
| 36 | O07603            | <i>yhfE</i> | Putative aminopeptidase yhfE                                    | +                | +                 |
| 37 | O07607            | <i>yhfl</i> | Uncharacterized protein yhfl                                    | +                | -                 |
| 38 | O07608            | <i>lplJ</i> | Lipoate-protein ligase LplJ                                     | +                | +                 |
| 39 | O07609            | <i>yhfK</i> | Uncharacterized sugar epimerase yhfK                            | +                | -                 |
| 40 | O07615            | <i>yhfP</i> | Putative quinone oxidoreductase YhfP                            | +                | +                 |
| 41 | O07622            | <i>yhfW</i> | Putative Rieske 2Fe-2S iron-sulfur protein yhfW                 | +                | +                 |
| 42 | O07631            | <i>typA</i> | GTP-binding protein TypA/BipA homolog                           | +                | +                 |
| 43 | O07634            | <i>ylaJ</i> | Uncharacterized lipoprotein ylaJ                                | +                | +                 |
| 44 | O08394            | <i>cypD</i> | Probable bifunctional P-450/NADPH-P450 reductase 1              | +                | +                 |
| 45 | O30509            | <i>gatB</i> | Aspartyl/glutamyl-tRNA(Asn/Gln) amidotransferase subunit B      | +                | +                 |
| 46 | O31473            | <i>ycgl</i> | Uncharacterized protein ycgl                                    | +                | +                 |
| 47 | O31489            | <i>ydcl</i> | Uncharacterized protein ydcl                                    | +                | +                 |
| 48 | O31498            | <i>ligA</i> | DNA ligase                                                      | +                | -                 |
| 49 | O31502            | <i>dagK</i> | Diacylglycerol kinase                                           | -                | +                 |
| 50 | O31533            | <i>yetF</i> | UPF0702 transmembrane protein yetF                              | +                | +                 |

|     |        |              |                                                                                   |   |   |
|-----|--------|--------------|-----------------------------------------------------------------------------------|---|---|
| 51  | O31545 | <i>yfjO</i>  | Uncharacterized RNA methyltransferase yfjO                                        | + | + |
| 52  | O31581 | <i>yfhM</i>  | AB hydrolase superfamily protein yfhM                                             | + | + |
| 53  | O31593 | <i>yhbJ</i>  | Putative efflux system component yhbJ                                             | + | - |
| 54  | O31601 | <i>yjbC</i>  | Putative acetyltransferase YjbC                                                   | + | - |
| 55  | O31605 | <i>yjbG</i>  | Oligoendopeptidase F homolog                                                      | + | + |
| 56  | O31612 | <i>ppnKA</i> | Probable inorganic polyphosphate/ATP-NAD kinase 1                                 | - | + |
| 57  | O31614 | <i>prpE</i>  | Bis(5'-nucleosyl)-tetraphosphatase prpE [asymmetrical]                            | + | + |
| 58  | O31615 | <i>yjbQ</i>  | Putative Na(+)/H(+) antiporter yjbQ                                               | + | - |
| 59  | O31629 | <i>yjcG</i>  | UPF0477 protein yjc                                                               | + | + |
| 60  | O31630 | <i>yjcH</i>  | Uncharacterized protein yjcH                                                      | + | + |
| 61  | O31649 | <i>yjdH</i>  | Uncharacterized protein yjdH                                                      | + | - |
| 62  | O31656 | <i>ykrK</i>  | Uncharacterized protein ykrK                                                      | + | - |
| 63  | O31657 | <i>htpX</i>  | Protease HtpX homolog                                                             | + | - |
| 64  | O31689 | <i>ykvY</i>  | Putative dipeptidase ykvY                                                         | + | + |
| 65  | O31714 | <i>fruK</i>  | 1-phosphofructokinase                                                             | + | + |
| 66  | O31716 | <i>ykpA</i>  | Uncharacterized ABC transporter ATP-binding protein YkpA                          | + | + |
| 67  | O31741 | <i>tmdD</i>  | tRNA (guanine-N(1)-)-methyltransferase                                            | - | + |
| 68  | O31742 | <i>rplS</i>  | 50S ribosomal protein L19                                                         | + | + |
| 69  | O31743 | <i>rbgA</i>  | Ribosome biogenesis GTPase A                                                      | + | + |
| 70  | O31749 | <i>pyrH</i>  | Uridylate kinase                                                                  | + | + |
| 71  | O31753 | <i>dxr</i>   | 1-deoxy-D-xylulose 5-phosphate reductoisomerase                                   | - | + |
| 72  | O31755 | <i>proS</i>  | Proline--tRNA ligase                                                              | + | + |
| 73  | O31760 | <i>rjyB</i>  | Ribonuclease J 2                                                                  | + | + |
| 74  | O31764 | <i>ymfF</i>  | Probable inactive metalloprotease ymfF                                            | + | + |
| 75  | O31766 | <i>ymfH</i>  | Uncharacterized zinc protease ymfH                                                | + | + |
| 76  | O31771 | <i>ymfM</i>  | Uncharacterized membrane protein ymfM                                             | + | - |
| 77  | O31774 | <i>rny</i>   | Ribonuclease Y                                                                    | + | + |
| 78  | O31777 | <i>kbl</i>   | Putative 8-amino-7-oxononanoate synthase/2-amino-3-ketobutyrate coenzyme A ligase | + | + |
| 79  | O31782 | <i>pksN</i>  | Polyketide synthase PksN                                                          | + | - |
| 80  | O31788 | <i>aprX</i>  | Serine protease AprX                                                              | + | - |
| 81  | O31816 | <i>yndM</i>  | Uncharacterized membrane protein yndM                                             | + | - |
| 82  | O31824 | <i>nrnB</i>  | Oligoribonuclease nrn                                                             | + | + |
| 83  | O31853 | <i>yojK</i>  | Uncharacterized UDP-glucosyltransferase yojK                                      | + | + |
| 84  | O31854 | <i>cdaS</i>  | Uncharacterized protein yojJ                                                      | + | + |
| 85  | O32028 | <i>mtnN</i>  | 5'-methylthioadenosine/S-adenosylhomocysteine nucleosidase                        | - | + |
| 86  | O32037 | <i>tcdA</i>  | Uncharacterized protein yrvM                                                      | + | + |
| 87  | O32038 | <i>aspS</i>  | Aspartate--tRNA ligase                                                            | + | + |
| 88  | O32039 | <i>hisS</i>  | Histidine--tRNA ligase                                                            | + | + |
| 89  | O32045 | <i>yrvD</i>  | Uncharacterized protein yrvD                                                      | + | + |
| 90  | O32047 | <i>secDF</i> | Protein translocase subunit SecDF                                                 | + | + |
| 91  | O32050 | <i>yrbG</i>  | UPF0702 transmembrane protein yrbG                                                | + | - |
| 92  | O32052 | <i>yrbF</i>  | UPF0092 membrane protein yrbF                                                     | + | + |
| 93  | O32053 | <i>tgt</i>   | Queuine tRNA-ribosyltransferase                                                   | + | + |
| 94  | O32054 | <i>queA</i>  | S-adenosylmethionine:tRNA ribosyltransferase-isomerase                            | + | + |
| 95  | O32076 | <i>yuaG</i>  | Uncharacterized protein yuaG                                                      | + | - |
| 96  | O32090 | <i>pncB</i>  | Nicotinate phosphoribosyltransferase                                              | + | + |
| 97  | O32106 | <i>pepA</i>  | Probable cytosol aminopeptidase                                                   | + | + |
| 98  | O32117 | <i>yutJ</i>  | NADH dehydrogenase-like protein yutJ                                              | + | + |
| 99  | O32125 | <i>yutF</i>  | Uncharacterized hydrolase yutF                                                    | + | + |
| 100 | O32128 | <i>yutC</i>  | Uncharacterized lipoprotein yutC                                                  | + | - |
| 101 | O32158 | <i>yurQ</i>  | Uncharacterized protein yurQ                                                      | + | + |
| 102 | O32162 | <i>sufB</i>  | FeS cluster assembly protein sufB                                                 | + | + |
| 103 | O32164 | <i>sufS</i>  | Probable cysteine desulfurase                                                     | + | + |

|     |        |              |                                                                 |   |   |
|-----|--------|--------------|-----------------------------------------------------------------|---|---|
| 104 | O32165 | <i>sufD</i>  | FeS cluster assembly protein sufD                               | + | + |
| 105 | O32167 | <i>metQ</i>  | Methionine-binding lipoprotein metQ                             | + | + |
| 106 | O32169 | <i>metN</i>  | Methionine import ATP-binding protein MetN                      | - | + |
| 107 | O32210 | <i>yvgN</i>  | Glyoxal reductase                                               | - | + |
| 108 | O32213 | <i>cysI</i>  | Sulfite reductase [NADPH] hemoprotein beta-component            | + | - |
| 109 | O32218 | <i>bdbD</i>  | Disulfide bond formation protein D                              | + | - |
| 110 | O32223 | <i>iolW</i>  | Uncharacterized oxidoreductase yvaA                             | + | + |
| 111 | O32224 | <i>azoR2</i> | FMN-dependent NADH-azoreductase 2                               | + | + |
| 112 | O32229 | <i>yvaG</i>  | Uncharacterized oxidoreductase yvaG                             | - | + |
| 113 | O32231 | <i>rnr</i>   | Ribonuclease R                                                  | + | + |
| 114 | O32232 | <i>est</i>   | Carboxylesterase                                                | + | + |
| 115 | O32254 | <i>yvbT</i>  | Uncharacterized protein yvbT                                    | + | - |
| 116 | O32268 | <i>tuaG</i>  | Putative teichuronic acid biosynthesis glycosyltransferase tuaG | + | + |
| 117 | O34334 | <i>yjoA</i>  | Uncharacterized protein yjoA                                    | - | + |
| 118 | O34340 | <i>fabF</i>  | 3-oxoacyl-[acyl-carrier-protein] synthase 2                     | + | + |
| 119 | O34348 | <i>yfmC</i>  | Fe(3+)-citrate-binding protein yfmC                             | + | + |
| 120 | O34355 | <i>yticJ</i> | Putative amidohydrolase ytcJ                                    | + | + |
| 121 | O34389 | <i>malS</i>  | Probable NAD-dependent malic enzyme 3                           | + | + |
| 122 | O34409 | <i>yflN</i>  | Uncharacterized protein yflN                                    | + | + |
| 123 | O34423 | <i>yjqC</i>  | Uncharacterized protein YjqC                                    | - | + |
| 124 | O34433 | <i>yobO</i>  | Putative phage-related protein yobO                             | - | + |
| 125 | O34443 | <i>apt</i>   | Adenine phosphoribosyltransferase                               | - | + |
| 126 | O34454 | <i>ykaA</i>  | UPF0111 protein ykaA                                            | + | + |
| 127 | O34470 | <i>yblL</i>  | Uncharacterized protein yblL                                    | + | - |
| 128 | O34475 | <i>yfkO</i>  | Putative NAD(P)H nitroreductase yfkO                            | + | + |
| 129 | O34493 | <i>ytmA</i>  | Uncharacterized peptidase ytmA                                  | + | - |
| 130 | O34497 | <i>ykgA</i>  | Uncharacterized protein ykgA                                    | + | + |
| 131 | O34499 | <i>pgl</i>   | Uncharacterized protein YkgB                                    | + | + |
| 132 | O34507 | <i>prkC</i>  | Serine/threonine-protein kinase PrkC                            | + | - |
| 133 | O34521 | <i>nagP</i>  | PTS system N-acetylglucosamine-specific EIICB component         | + | - |
| 134 | O34525 | <i>sppA</i>  | Putative signal peptide peptidase sppA                          | + | - |
| 135 | O34526 | <i>alaS</i>  | Alanine--tRNA ligase                                            | + | + |
| 136 | O34529 | <i>pfkA</i>  | 6-phosphofructokinase                                           | + | + |
| 137 | O34543 | <i>mhqE</i>  | Putative ring-cleaving dioxygenase mhqE                         | + | + |
| 138 | O34558 | <i>yopR</i>  | SPBc2 prophage-derived uncharacterized protein yopR             | + | + |
| 139 | O34564 | <i>ykuU</i>  | Thioredoxin-like protein ykuU                                   | + | + |
| 140 | O34570 | <i>ytIP</i>  | UPF0097 protein ytIP                                            | + | - |
| 141 | O34580 | <i>pcrA</i>  | ATP-dependent DNA helicase pcrA                                 | + | + |
| 142 | O34586 | <i>ybcC</i>  | Uncharacterized membrane protein ybcC                           | + | - |
| 143 | O34595 | <i>thil</i>  | Probable tRNA sulfurtransferase                                 | - | + |
| 144 | O34599 | <i>iscS1</i> | Putative cysteine desulfurase IscS 1                            | + | + |
| 145 | O34600 | <i>nrnA</i>  | Bifunctional oligoribonuclease and PAP phosphatase nrnA         | + | + |
| 146 | O34617 | <i>rlmN</i>  | Ribosomal RNA large subunit methyltransferase N                 | + | - |
| 147 | O34628 | <i>yvIB</i>  | Uncharacterized protein yvIB                                    | + | - |
| 148 | O34629 | <i>yerH</i>  | Uncharacterized lipoprotein yerH                                | + | - |
| 149 | O34645 | <i>melA</i>  | Alpha-galactosidase                                             | - | + |
| 150 | O34654 | <i>yodI</i>  | Uncharacterized protein yodI                                    | + | + |
| 151 | O34666 | <i>ctpA</i>  | Carboxy-terminal processing protease CtpA                       | + | - |
| 152 | O34689 | <i>mhqA</i>  | Putative ring-cleaving dioxygenase mhqA                         | + | + |
| 153 | O34717 | <i>fadH</i>  | Probable 2,4-dienoyl-CoA reductase                              | + | - |
| 154 | O34726 | <i>yflS</i>  | Putative malate transporter yflS                                | + | + |
| 155 | O34746 | <i>fabHA</i> | 3-oxoacyl-[acyl-carrier-protein] synthase 3 protein 1           | + | + |
| 156 | O34750 | <i>yfmL</i>  | Putative ATP-dependent RNA helicase yfmL                        | + | + |
| 157 | O34752 | <i>lgt</i>   | Prolipoprotein diacylglycerol transferase                       | + | - |

|     |        |              |                                                                 |   |   |
|-----|--------|--------------|-----------------------------------------------------------------|---|---|
| 158 | O34782 | <i>yvrD</i>  | Uncharacterized oxidoreductase <i>yvrD</i>                      | + | + |
| 159 | O34788 | <i>bdhA</i>  | (R,R)-butanediol dehydrogenase                                  | + | + |
| 160 | O34806 | <i>ytfJ</i>  | Uncharacterized spore protein <i>ytfJ</i>                       | + | + |
| 161 | O34812 | <i>yfmJ</i>  | Putative NADP-dependent oxidoreductase <i>yfmJ</i>              | + | + |
| 162 | O34824 | <i>glmM</i>  | Phosphoglucosamine mutase                                       | + | + |
| 163 | O34827 | <i>ykuM</i>  | Uncharacterized HTH-type transcriptional regulator <i>ykuM</i>  | - | + |
| 164 | O34840 | <i>chaA</i>  | Putative cation exchanger <i>chaA</i>                           | + | - |
| 165 | O34842 | <i>mhqD</i>  | Putative hydrolase <i>MhqD</i>                                  | + | + |
| 166 | O34847 | <i>accA</i>  | Acetyl-coenzyme A carboxylase carboxyl transferase subunit alph | + | + |
| 167 | O34859 | <i>ku</i>    | Probable DNA repair protein <i>ykoV</i>                         | + | + |
| 168 | O34860 | <i>rsbRB</i> | RsbT co-antagonist protein <i>rsbRB</i>                         | - | + |
| 169 | O34863 | <i>uvrA</i>  | UvrABC system protein A                                         | + | + |
| 170 | O34885 | <i>ydiS</i>  | Type-2 restriction enzyme <i>BsuMI</i> component <i>ydiS</i>    | + | + |
| 171 | O34894 | <i>ezrA</i>  | Septation ring formation regulator <i>EzrA</i>                  | + | - |
| 172 | O34915 | <i>yobE</i>  | UPF0361 protein <i>yobE</i>                                     | - | + |
| 173 | O34924 | <i>ytoP</i>  | Putative aminopeptidase <i>ytoP</i>                             | + | + |
| 174 | O34925 | <i>deoD</i>  | Purine nucleoside phosphorylase <i>deoD</i> -type               | + | + |
| 175 | O34934 | <i>nadK2</i> | Probable inorganic polyphosphate/ATP-NAD kinase 2               | + | + |
| 176 | O34940 | <i>yvrE</i>  | Uncharacterized protein <i>yvrE</i>                             | + | + |
| 177 | O34944 | <i>ytjP</i>  | Putative dipeptidase <i>ytjP</i>                                | + | + |
| 178 | O34962 | <i>ytsJ</i>  | Probable NAD-dependent malic enzyme 4                           | + | + |
| 179 | O34966 | <i>znuA</i>  | Zinc transport system zinc-binding lipoprotein <i>ZnuA</i>      | + | + |
| 180 | O34968 | <i>yerB</i>  | Putative lipoprotein <i>yerB</i>                                | + | - |
| 181 | O34987 | <i>pbuG</i>  | Guanine/hypoxanthine permease <i>pbuG</i>                       | + | - |
| 182 | O34996 | <i>polA</i>  | DNA polymerase I                                                | + | + |
| 183 | O35020 | <i>mnmA</i>  | tRNA-specific 2-thiouridylase <i>mnmA</i>                       | - | + |
| 184 | O35023 | <i>sodF</i>  | Probable superoxide dismutase [Fe]                              | - | + |
| 185 | O35028 | <i>yfkR</i>  | Putative spore germination protein <i>yfkR</i>                  | + | - |
| 186 | O54408 | <i>relA</i>  | GTP pyrophosphokinase                                           | + | + |
| 187 | P04969 | <i>rpsK</i>  | 30S ribosomal protein S11                                       | + | + |
| 188 | P05648 | <i>dnaA</i>  | Chromosomal replication initiator protein <i>DnaA</i>           | + | + |
| 189 | P05649 | <i>dnaN</i>  | DNA polymerase III subunit beta                                 | + | + |
| 190 | P05651 | <i>recF</i>  | DNA replication and repair protein <i>recF</i>                  | + | + |
| 191 | P05652 | <i>gyrB</i>  | DNA gyrase subunit B                                            | + | + |
| 192 | P05653 | <i>gyrA</i>  | DNA gyrase subunit A                                            | + | + |
| 193 | P06224 | <i>sigA</i>  | RNA polymerase sigma factor <i>rpoD</i>                         | + | + |
| 194 | P07343 | <i>fumC</i>  | Fumarate hydratase class II                                     | + | + |
| 195 | P07870 | <i>gerAC</i> | Spore germination protein A3                                    | + | + |
| 196 | P08065 | <i>sdhA</i>  | Succinate dehydrogenase flavoprotein subunit                    | + | + |
| 197 | P08066 | <i>sdhB</i>  | Succinate dehydrogenase iron-sulfur subunit                     | - | + |
| 198 | P08164 | <i>nadE</i>  | NH(3)-dependent NAD(+) synthetase                               | + | + |
| 199 | P08750 | <i>dacA</i>  | D-alanyl-D-alanine carboxypeptidase <i>dacA</i>                 | + | + |
| 200 | P08838 | <i>ptsI</i>  | Phosphoenolpyruvate-protein phosphotransferase                  | + | + |
| 201 | P09124 | <i>gapA</i>  | Glyceraldehyde-3-phosphate dehydrogenase 1                      | + | + |
| 202 | P09339 | <i>citB</i>  | Aconitate hydratase                                             | + | + |
| 203 | P0C173 | <i>glmS</i>  | Glucosamine--fructose-6-phosphate aminotransferase              | + | - |
| 204 | P10944 | <i>hutH</i>  | Histidine ammonia-lyase                                         | + | + |
| 205 | P11998 | <i>ribH</i>  | 6,7-dimethyl-8-ribityllumazine synthase                         | + | + |
| 206 | P12011 | <i>gntK</i>  | Gluconokinase                                                   | + | - |
| 207 | P12013 | <i>gntZ</i>  | 6-phosphogluconate dehydrogenase, decarboxylating               | + | + |
| 208 | P12047 | <i>purB</i>  | Adenylosuccinate lyase                                          | + | + |
| 209 | P12310 | <i>gdh</i>   | Glucose 1-dehydrogenase                                         | + | + |
| 210 | P12425 | <i>glnA</i>  | Glutamine synthetase                                            | + | + |
| 211 | P12877 | <i>rplE</i>  | 50S ribosomal protein L5                                        | + | + |



|     |        |              |                                                                                                   |   |   |
|-----|--------|--------------|---------------------------------------------------------------------------------------------------|---|---|
| 212 | P13242 | <i>pyrG</i>  | CTP synthase                                                                                      | + | + |
| 213 | P13243 | <i>fbaA</i>  | Probable fructose-bisphosphate aldolase                                                           | + | + |
| 214 | P13792 | <i>phoP</i>  | Alkaline phosphatase synthesis transcriptional regulatory protein                                 | + | - |
| 215 | P14016 | <i>cotE</i>  | Spore coat protein E                                                                              | + | + |
| 216 | P14193 | <i>prs</i>   | Ribose-phosphate pyrophosphokinase                                                                | + | + |
| 217 | P14577 | <i>rplP</i>  | 50S ribosomal protein L16                                                                         | + | + |
| 218 | P14802 | <i>yoxD</i>  | Uncharacterized oxidoreductase yoxD                                                               | + | - |
| 219 | P16263 | <i>odhB</i>  | Dihydrolipoyllysine-residue succinyltransferase component of 2-oxoglutarate dehydrogenase complex | + | - |
| 220 | P16304 | <i>adk</i>   | Adenylate kinase                                                                                  | - | + |
| 221 | P16336 | <i>secY</i>  | Protein translocase subunit SecY                                                                  | + | - |
| 222 | P16440 | <i>ribE</i>  | Riboflavin synthase alpha chain                                                                   | - | + |
| 223 | P16450 | <i>gerD</i>  | Spore germination protein gerD                                                                    | + | + |
| 224 | P16524 | <i>dapX</i>  | Putative aminotransferase A                                                                       | - | + |
| 225 | P16616 | <i>hemC</i>  | Porphobilinogen deaminase                                                                         | + | + |
| 226 | P17620 | <i>ribBA</i> | Riboflavin biosynthesis protein ribBA                                                             | + | + |
| 227 | P17631 | <i>dnaJ</i>  | Chaperone protein DnaJ                                                                            | - | + |
| 228 | P17820 | <i>dnaK</i>  | Chaperone protein DnaK                                                                            | + | + |
| 229 | P17889 | <i>infB</i>  | Translation initiation factor IF-2                                                                | + | + |
| 230 | P17921 | <i>pheS</i>  | Phenylalanine--tRNA ligase alpha chain                                                            | + | + |
| 231 | P17922 | <i>pheT</i>  | Phenylalanine--tRNA ligase beta chain                                                             | + | + |
| 232 | P18157 | <i>glpK</i>  | Glycerol kinase                                                                                   | + | + |
| 233 | P18158 | <i>glpD</i>  | Aerobic glycerol-3-phosphate dehydrogenase                                                        | + | + |
| 234 | P18255 | <i>thrS</i>  | Threonine--tRNA ligase 1                                                                          | + | + |
| 235 | P18579 | <i>murB</i>  | UDP-N-acetylenolpyruvoylglucosamine reductase                                                     | - | + |
| 236 | P19465 | <i>folE</i>  | GTP cyclohydrolase 1                                                                              | + | - |
| 237 | P19582 | <i>hom</i>   | Homoserine dehydrogenase                                                                          | + | + |
| 238 | P19669 | <i>tal</i>   | Transaldolase                                                                                     | + | + |
| 239 | P19670 | <i>murAB</i> | UDP-N-acetylglucosamine 1-carboxyvinyltransferase 2                                               | + | + |
| 240 | P20166 | <i>ptsG</i>  | PTS system glucose-specific EIICBA component                                                      | + | + |
| 241 | P20277 | <i>rplQ</i>  | 50S ribosomal protein L17                                                                         | + | + |
| 242 | P20282 | <i>rpsM</i>  | 30S ribosomal protein S13                                                                         | + | + |
| 243 | P20429 | <i>rpoA</i>  | DNA-directed RNA polymerase subunit alpha                                                         | + | + |
| 244 | P20964 | <i>obg</i>   | GTPase obgE                                                                                       | + | + |
| 245 | P21464 | <i>rpsB</i>  | 30S ribosomal protein S2                                                                          | + | + |
| 246 | P21465 | <i>rpsC</i>  | 30S ribosomal protein S3                                                                          | + | + |
| 247 | P21466 | <i>rpsD</i>  | 30S ribosomal protein S4                                                                          | + | + |
| 248 | P21467 | <i>rpsE</i>  | 30S ribosomal protein S5                                                                          | + | + |
| 249 | P21469 | <i>rpsG</i>  | 30S ribosomal protein S7                                                                          | + | + |
| 250 | P21470 | <i>rpsI</i>  | 30S ribosomal protein S9                                                                          | - | + |
| 251 | P21472 | <i>rpsL</i>  | 30S ribosomal protein S12                                                                         | + | - |
| 252 | P21656 | <i>trpS</i>  | Tryptophan--tRNA ligase                                                                           | + | + |
| 253 | P21879 | <i>guaB</i>  | Inosine-5'-monophosphate dehydrogenase                                                            | + | + |
| 254 | P21880 | <i>pdhD</i>  | Dihydrolipoyl dehydrogenase                                                                       | + | + |
| 255 | P21881 | <i>pdhA</i>  | Pyruvate dehydrogenase E1 component subunit alpha                                                 | + | + |
| 256 | P21882 | <i>pdhB</i>  | Pyruvate dehydrogenase E1 component subunit beta                                                  | + | + |
| 257 | P21883 | <i>pdhC</i>  | Dihydrolipoyllysine-residue acetyltransferase component of pyruvate dehydrogenase complex         | + | + |
| 258 | P21885 | <i>speA</i>  | Arginine decarboxylase                                                                            | + | + |
| 259 | P22250 | <i>gltX</i>  | Glutamate--tRNA ligase                                                                            | + | + |
| 260 | P22322 | <i>gpr</i>   | Germination protease                                                                              | + | + |
| 261 | P22326 | <i>tyrS1</i> | Tyrosine--tRNA ligase 1                                                                           | + | + |
| 262 | P23129 | <i>odhA</i>  | 2-oxoglutarate dehydrogenase E1 component                                                         | + | + |
| 263 | P23261 | <i>cotF</i>  | Spore coat protein F                                                                              | + | + |

|     |        |               |                                                          |   |   |
|-----|--------|---------------|----------------------------------------------------------|---|---|
| 264 | P23545 | <i>phoR</i>   | Alkaline phosphatase synthesis sensor protein phoR       | + | - |
| 265 | P23630 | <i>lysA</i>   | Diaminopimelate decarboxylase                            | + | + |
| 266 | P23966 | <i>menB</i>   | 1,4-Dihydroxy-2-naphthoyl-CoA synthase                   | + | + |
| 267 | P24136 | <i>oppD</i>   | Oligopeptide transport ATP-binding protein OppD          | + | + |
| 268 | P24137 | <i>oppF</i>   | Oligopeptide transport ATP-binding protein OppF          | + | + |
| 269 | P24138 | <i>oppB</i>   | Oligopeptide transport system permease protein OppB      | + | - |
| 270 | P24139 | <i>oppC</i>   | Oligopeptide transport system permease protein OppC      | + | + |
| 271 | P24141 | <i>oppA</i>   | Oligopeptide-binding protein OppA                        | + | + |
| 272 | P24327 | <i>prsA</i>   | Foldase protein prsA                                     | + | + |
| 273 | P25144 | <i>ccpA</i>   | Catabolite control protein A                             | + | + |
| 274 | P25972 | <i>pyrE</i>   | Orotate phosphoribosyltransferase                        | + | - |
| 275 | P26899 | <i>ansB</i>   | Aspartate ammonia-lyase                                  | + | + |
| 276 | P26900 | <i>ansA</i>   | L-asparaginase 1                                         | + | + |
| 277 | P26902 | <i>dppA</i>   | D-aminopeptidase                                         | + | + |
| 278 | P27876 | <i>tpiA</i>   | Triosephosphate isomerase,                               | + | + |
| 279 | P28366 | <i>secA</i>   | Protein translocase subunit SecA                         | + | + |
| 280 | P28598 | <i>groL</i>   | 60 kDa chaperonin                                        | + | + |
| 281 | P28619 | <i>rph</i>    | Ribonuclease PH                                          | + | + |
| 282 | P28628 | <i>sipS</i>   | Signal peptidase I S                                     | + | - |
| 283 | P29726 | <i>purA</i>   | Adenylosuccinate synthetase                              | + | + |
| 284 | P29727 | <i>guaA</i>   | GMP synthase [glutamine-hydrolyzing]                     | + | + |
| 285 | P30300 | <i>glpP</i>   | Glycerol uptake operon antiterminator regulatory protein | + | - |
| 286 | P30949 | <i>hemL</i>   | Glutamate-1-semialdehyde 2,1-aminomutase                 | + | + |
| 287 | P30950 | <i>hemB</i>   | Delta-aminolevulinic acid dehydratase                    | + | + |
| 288 | P31102 | <i>aroB</i>   | 3-dehydroquinate synthase                                | + | + |
| 289 | P31103 | <i>ndk</i>    | Nucleoside diphosphate kinase                            | - | + |
| 290 | P31104 | <i>aroC</i>   | Chorismate synthase                                      | + | + |
| 291 | P31845 | <i>spoVAF</i> | Stage V sporulation protein AF                           | + | + |
| 292 | P32395 | <i>hemE</i>   | Uroporphyrinogen decarboxylase                           | + | + |
| 293 | P32396 | <i>hemH</i>   | Ferrochelataase                                          | + | + |
| 294 | P32397 | <i>hemY</i>   | Protoporphyrinogen oxidase                               | + | + |
| 295 | P32727 | <i>nusA</i>   | Transcription elongation protein nusA                    | - | + |
| 296 | P32731 | <i>rbfA</i>   | Ribosome-binding factor A                                | + | + |
| 297 | P33166 | <i>tuf</i>    | Elongation factor Tu                                     | + | + |
| 298 | P34957 | <i>qoxA</i>   | Quinol oxidase subunit 2                                 | + | + |
| 299 | P35136 | <i>serA</i>   | D-3-phosphoglycerate dehydrogenase                       | + | + |
| 300 | P35137 | <i>ppiB</i>   | Peptidyl-prolyl cis-trans isomerase B                    | - | + |
| 301 | P35149 | <i>spoIVA</i> | Stage IV sporulation protein A                           | - | + |
| 302 | P35159 | <i>rluB</i>   | Ribosomal large subunit pseudouridine synthase B         | + | + |
| 303 | P35160 | <i>resA</i>   | Thiol-disulfide oxidoreductase resA                      | + | - |
| 304 | P35163 | <i>resD</i>   | Transcriptional regulatory protein resD                  | + | + |
| 305 | P36430 | <i>leuS</i>   | Leucine--tRNA ligase                                     | + | + |
| 306 | P36945 | <i>rbsK</i>   | Ribokinase                                               | + | + |
| 307 | P36947 | <i>rbsA</i>   | Ribose import ATP-binding protein RbsA                   | + | + |
| 308 | P36949 | <i>rbsB</i>   | D-ribose-binding protein                                 | + | - |
| 309 | P37105 | <i>ffh</i>    | Signal recognition particle protein                      | + | + |
| 310 | P37455 | <i>ssbA</i>   | Single-stranded DNA-binding protein ssb                  | - | + |
| 311 | P37464 | <i>serS</i>   | Serine--tRNA ligase                                      | + | + |
| 312 | P37465 | <i>metG</i>   | Methionine--tRNA ligase                                  | + | + |
| 313 | P37470 | <i>spoVC</i>  | Peptidyl-tRNA hydrolase                                  | - | + |
| 314 | P37472 | <i>hprT</i>   | Hypoxanthine-guanine phosphoribosyltransferase           | + | + |
| 315 | P37474 | <i>mfd</i>    | Transcription-repair-coupling factor                     | + | + |
| 316 | P37476 | <i>ftsH</i>   | ATP-dependent zinc metalloprotease FtsH                  | + | + |
| 317 | P37477 | <i>lysS</i>   | Lysine--tRNA ligase                                      | + | + |

|     |        |               |                                                                                                                     |   |   |
|-----|--------|---------------|---------------------------------------------------------------------------------------------------------------------|---|---|
| 318 | P37487 | <i>ppaC</i>   | Manganese-dependent inorganic pyrophosphatase                                                                       | + | + |
| 319 | P37518 | <i>ychF</i>   | GTP-dependent nucleic acid-binding protein engD                                                                     | + | + |
| 320 | P37526 | <i>yaaC</i>   | Uncharacterized protein yaaC                                                                                        | + | + |
| 321 | P37527 | <i>pdxS</i>   | Pyridoxal biosynthesis lyase pdxS                                                                                   | + | + |
| 322 | P37528 | <i>pdxT</i>   | Glutamine amidotransferase subunit pdxT                                                                             | + | + |
| 323 | P37531 | <i>sleL</i>   | Spore germination protein yaaH                                                                                      | + | + |
| 324 | P37545 | <i>yabD</i>   | Uncharacterized deoxyribonuclease YabD                                                                              | - | + |
| 325 | P37550 | <i>ispE</i>   | 4-diphosphocytidyl-2-C-methyl-D-erythritol kinase                                                                   | - | + |
| 326 | P37551 | <i>purR</i>   | Pur operon repressor                                                                                                | - | + |
| 327 | P37554 | <i>spoVT</i>  | Stage V sporulation protein T                                                                                       | + | + |
| 328 | P37556 | <i>yabN</i>   | Uncharacterized protein yabN                                                                                        | + | + |
| 329 | P37565 | <i>hslO</i>   | 33 kDa chaperonin                                                                                                   | - | + |
| 330 | P37566 | <i>yacD</i>   | Putative peptidyl-prolyl cis-trans isomerase YacD                                                                   | + | - |
| 331 | P37569 | <i>mcsA</i>   | Uncharacterized protein yacH                                                                                        | - | + |
| 332 | P37570 | <i>mcsB</i>   | Putative ATP:guanido phosphotransferase yacI                                                                        | + | + |
| 333 | P37571 | <i>clpC</i>   | Negative regulator of genetic competence ClpC/MecB                                                                  | + | + |
| 334 | P37580 | <i>fhuD</i>   | Iron(3+)-hydroxamate-binding protein fhuD                                                                           | + | + |
| 335 | P37585 | <i>murG</i>   | UDP-N-acetylglucosamine--N-acetylmuramyl-(pentapeptide) pyrophosphoryl-undecaprenol N-acetylglucosamine transferase | + | + |
| 336 | P37808 | <i>atpA</i>   | ATP synthase subunit alpha                                                                                          | + | + |
| 337 | P37809 | <i>atpD</i>   | ATP synthase subunit beta                                                                                           | + | + |
| 338 | P37810 | <i>atpG</i>   | ATP synthase gamma chain                                                                                            | + | + |
| 339 | P37811 | <i>atpH</i>   | ATP synthase subunit delta                                                                                          | - | + |
| 340 | P37813 | <i>atpB</i>   | ATP synthase subunit a                                                                                              | + | - |
| 341 | P37814 | <i>atpF</i>   | ATP synthase subunit b                                                                                              | + | + |
| 342 | P37869 | <i>eno</i>    | Enolase                                                                                                             | + | + |
| 343 | P37870 | <i>rpoB</i>   | DNA-directed RNA polymerase subunit beta                                                                            | + | + |
| 344 | P37871 | <i>rpoC</i>   | DNA-directed RNA polymerase subunit beta'                                                                           | + | + |
| 345 | P37876 | <i>ytxK</i>   | Uncharacterized protein ytxK                                                                                        | + | + |
| 346 | P37877 | <i>ackA</i>   | Acetate kinase                                                                                                      | + | + |
| 347 | P37887 | <i>cysK</i>   | Cysteine synthase                                                                                                   | + | + |
| 348 | P37940 | <i>bfmBAA</i> | 2-oxoisovalerate dehydrogenase subunit alpha                                                                        | + | - |
| 349 | P37941 | <i>bfmBAB</i> | 2-oxoisovalerate dehydrogenase subunit beta                                                                         | + | + |
| 350 | P37942 | <i>bfmBB</i>  | Lipoamide acyltransferase component of branched-chain alpha-keto acid dehydrogenase complex                         | + | + |
| 351 | P37945 | <i>lon1</i>   | Lon protease 1                                                                                                      | + | + |
| 352 | P37949 | <i>lepA</i>   | Elongation factor 4                                                                                                 | + | + |
| 353 | P37954 | <i>uvrB</i>   | UvrABC system protein B                                                                                             | + | + |
| 354 | P37956 | <i>spIB</i>   | Spore photoproduct lyase                                                                                            | + | + |
| 355 | P37967 | <i>pnbA</i>   | Para-nitrobenzyl esterase                                                                                           | - | + |
| 356 | P38050 | <i>pbpF</i>   | Penicillin-binding protein 1F                                                                                       | + | - |
| 357 | P38424 | <i>engB</i>   | Probable GTP-binding protein EngB                                                                                   | - | + |
| 358 | P38490 | <i>ypeB</i>   | Sporulation protein ypeB                                                                                            | + | + |
| 359 | P38494 | <i>yfpD</i>   | 30S ribosomal protein S1 homolog                                                                                    | - | + |
| 360 | P39071 | <i>dhbA</i>   | 2,3-dihydro-2,3-dihydroxybenzoate dehydrogenase                                                                     | + | + |
| 361 | P39074 | <i>bmrU</i>   | Putative lipid kinase BmrU                                                                                          | + | + |
| 362 | P39126 | <i>icd</i>    | Isocitrate dehydrogenase [NADP]                                                                                     | + | + |
| 363 | P39131 | <i>mnaA</i>   | UDP-N-acetylglucosamine 2-epimerase                                                                                 | - | + |
| 364 | P39138 | <i>rocF</i>   | Arginase                                                                                                            | + | + |
| 365 | P39142 | <i>pdp</i>    | Pyrimidine-nucleoside phosphorylase                                                                                 | + | + |
| 366 | P39148 | <i>glyA</i>   | Pyridoxal-phosphate-dependent serine hydroxymethyltransferase                                                       | + | + |
| 367 | P39149 | <i>upp</i>    | Uracil phosphoribosyltransferase                                                                                    | + | + |
| 368 | P39571 | <i>gerBC</i>  | Spore germination protein B3                                                                                        | + | + |
| 369 | P39574 | <i>galK</i>   | Galactokinase                                                                                                       | + | + |

|     |        |                |                                                               |   |   |
|-----|--------|----------------|---------------------------------------------------------------|---|---|
| 370 | P39575 | <i>galT</i>    | Galactose-1-phosphate uridylyltransferase                     | + | - |
| 371 | P39577 | <i>dltE</i>    | Uncharacterized oxidoreductase dltE                           | + | + |
| 372 | P39578 | <i>dltD</i>    | Protein dltD                                                  | + | - |
| 373 | P39587 | <i>ywbD</i>    | Putative ribosomal RNA large subunit methyltransferase YwbD   | - | + |
| 374 | P39605 | <i>nfrA1</i>   | FMN reductase (NADPH)                                         | + | + |
| 375 | P39634 | <i>rocA</i>    | 1-pyrroline-5-carboxylate dehydrogenase                       | + | + |
| 376 | P39644 | <i>bacG</i>    | Bacilysin biosynthesis oxidoreductase ywfH                    | - | + |
| 377 | P39645 | <i>ywfl</i>    | UPF0447 protein ywfl                                          | - | + |
| 378 | P39646 | <i>pta</i>     | Phosphate acetyltransferase                                   | + | + |
| 379 | P39668 | <i>yyxA</i>    | Uncharacterized serine protease yyxA                          | + | + |
| 380 | P39751 | <i>mbl</i>     | MreB-like protein                                             | + | + |
| 381 | P39762 | <i>ampS</i>    | Aminopeptidase AmpS                                           | + | + |
| 382 | P39765 | <i>pyrR</i>    | Bifunctional protein pyrR                                     | + | + |
| 383 | P39772 | <i>asnS</i>    | Asparagine--tRNA ligase                                       | + | + |
| 384 | P39773 | <i>gpml</i>    | 2,3-bisphosphoglycerate-independent phosphoglycerate mutase   | + | + |
| 385 | P39778 | <i>clpY</i>    | ATP-dependent protease ATPase subunit ClpY                    | + | + |
| 386 | P39779 | <i>codY</i>    | GTP-sensing transcriptional pleiotropic repressor CodY        | + | + |
| 387 | P39793 | <i>ponA</i>    | Penicillin-binding protein 1A/1B                              | + | - |
| 388 | P39814 | <i>topA</i>    | DNA topoisomerase 1                                           | + | + |
| 389 | P39815 | <i>trmFO</i>   | Methylenetetrahydrofolate--tRNA-(uracil-5-)-methyltransferase | - | + |
| 390 | P39839 | <i>yuxL</i>    | Uncharacterized peptidase yuxL                                | + | + |
| 391 | P39840 | <i>galM</i>    | Aldose 1-epimerase                                            | + | + |
| 392 | P40397 | <i>yhxC</i>    | Uncharacterized oxidoreductase yhxC                           | + | + |
| 393 | P40740 | <i>bgIH</i>    | Aryl-phospho-beta-D-glucosidase BgIH                          | + | + |
| 394 | P40778 | <i>murC</i>    | UDP-N-acetylmuramate--L-alanine ligase                        | + | + |
| 395 | P40779 | <i>ytxG</i>    | UPF0478 protein ytxG                                          | + | - |
| 396 | P40780 | <i>ytxH</i>    | Uncharacterized protein ytxH                                  | + | + |
| 397 | P40868 | <i>spoVAC</i>  | Stage V sporulation protein AC                                | + | - |
| 398 | P40869 | <i>spoVAD</i>  | Stage V sporulation protein AD                                | + | + |
| 399 | P40870 | <i>spoVAEA</i> | Stage V sporulation protein AE                                | + | - |
| 400 | P40924 | <i>pgk</i>     | Phosphoglycerate kinase                                       | + | + |
| 401 | P42060 | <i>rplV</i>    | 50S ribosomal protein L22                                     | + | + |
| 402 | P42068 | <i>hutG</i>    | Formimidoylglutamase                                          | + | + |
| 403 | P42084 | <i>hutI</i>    | Imidazolonepropionase                                         | + | + |
| 404 | P42182 | <i>era</i>     | GTPase Era                                                    | + | + |
| 405 | P42199 | <i>tcyA</i>    | L-cystine-binding protein tcyA                                | + | + |
| 406 | P42305 | <i>dbpA</i>    | ATP-dependent RNA helicase dbpA                               | + | + |
| 407 | P42400 | <i>yckB</i>    | Probable ABC transporter extracellular-binding protein yckB   | + | - |
| 408 | P42403 | <i>bgIC</i>    | Aryl-phospho-beta-D-glucosidase BgIC                          | + | + |
| 409 | P42412 | <i>iolA</i>    | Methylmalonate semialdehyde dehydrogenase [acylating]         | + | + |
| 410 | P42413 | <i>iolB</i>    | 5-deoxy-glucuronate isomerase                                 | + | - |
| 411 | P42414 | <i>iolC</i>    | 5-dehydro-2-deoxygluconokinase                                | + | + |
| 412 | P42415 | <i>iolD</i>    | 3D-(3,5/4)-trihydroxycyclohexane-1,2-dione hydrolase          | + | + |
| 413 | P42418 | <i>iolH</i>    | Protein iolH                                                  | + | + |
| 414 | P42419 | <i>iolI</i>    | Inosose isomerase                                             | + | + |
| 415 | P42919 | <i>rplB</i>    | 50S ribosomal protein L2                                      | + | + |
| 416 | P42920 | <i>rplC</i>    | 50S ribosomal protein L3                                      | + | + |
| 417 | P42921 | <i>rplD</i>    | 50S ribosomal protein L4                                      | + | + |
| 418 | P42923 | <i>rplJ</i>    | 50S ribosomal protein L10                                     | + | + |
| 419 | P42953 | <i>tagG</i>    | Teichoic acid translocation permease protein tagG             | + | - |
| 420 | P42958 | <i>ycsA</i>    | Probable tartrate dehydrogenase/decarboxylase                 | + | + |
| 421 | P42972 | <i>ycsN</i>    | Uncharacterized oxidoreductase YcsN                           | - | + |
| 422 | P42973 | <i>bgIA</i>    | Aryl-phospho-beta-D-glucosidase BgIA                          | + | + |
| 423 | P42974 | <i>ahpF</i>    | NADH dehydrogenase                                            | + | + |

|     |        |              |                                                            |   |   |
|-----|--------|--------------|------------------------------------------------------------|---|---|
| 424 | P45694 | <i>tkt</i>   | Transketolase                                              | + | + |
| 425 | P45864 | <i>uvrE</i>  | UV DNA damage endonuclease                                 | + | + |
| 426 | P45865 | <i>clsB</i>  | Uncharacterized protein YwjE                               | + | - |
| 427 | P45872 | <i>prfA</i>  | Peptide chain release factor 1                             | + | + |
| 428 | P45914 | <i>yqaR</i>  | Uncharacterized protein yqaR                               | + | - |
| 429 | P46323 | <i>cinA</i>  | Putative competence-damage inducible protein               | + | + |
| 430 | P46336 | <i>iolS</i>  | Protein IolS                                               | + | + |
| 431 | P46337 | <i>iolR</i>  | HTH-type transcriptional regulator iolR                    | - | + |
| 432 | P46343 | <i>phoH</i>  | PhoH-like protein                                          | + | + |
| 433 | P46353 | <i>drm</i>   | Phosphopentomutase                                         | + | + |
| 434 | P46354 | <i>punA</i>  | Purine nucleoside phosphorylase 1                          | + | + |
| 435 | P46898 | <i>rplF</i>  | 50S ribosomal protein L6                                   | + | + |
| 436 | P46899 | <i>rplR</i>  | 50S ribosomal protein L18                                  | + | + |
| 437 | P46905 | <i>yccK</i>  | Uncharacterized oxidoreductase YccK                        | + | + |
| 438 | P46906 | <i>argS</i>  | Arginine--tRNA ligase                                      | + | + |
| 439 | P46911 | <i>qcrA</i>  | Menaquinol-cytochrome c reductase iron-sulfur subunit      | + | + |
| 440 | P46912 | <i>qcrB</i>  | Menaquinol-cytochrome c reductase cytochrome b subunit     | + | + |
| 441 | P46919 | <i>gpsA</i>  | Glycerol-3-phosphate dehydrogenase [NAD(P)+]               | + | + |
| 442 | P46920 | <i>opuAA</i> | Glycine betaine transport ATP-binding protein OpuAA        | + | + |
| 443 | P46921 | <i>opuAB</i> | Glycine betaine transport system permease protein opuAB    | + | + |
| 444 | P46922 | <i>opuAC</i> | Glycine betaine-binding protein                            | + | - |
| 445 | P49787 | <i>accC1</i> | Biotin carboxylase 1                                       | + | + |
| 446 | P49852 | <i>hmp</i>   | Flavoheмоprotein                                           | + | + |
| 447 | P49941 | <i>gerKC</i> | Spore germination protein KC                               | + | + |
| 448 | P50736 | <i>ypdA</i>  | Uncharacterized protein ypdA                               | + | + |
| 449 | P50739 | <i>sleB</i>  | Spore cortex-lytic enzyme                                  | + | + |
| 450 | P50743 | <i>der</i>   | GTPase Der                                                 | + | + |
| 451 | P50840 | <i>ypsC</i>  | Putative RNA methyltransferase YpsC                        | + | + |
| 452 | P50843 | <i>kdul</i>  | 4-deoxy-L-threo-5-hexosulose-uronate ketol-isomerase       | + | + |
| 453 | P50848 | <i>ypwA</i>  | Putative metalloprotease ypwA                              | + | + |
| 454 | P50849 | <i>pnp</i>   | Polyribonucleotide nucleotidyltransferase                  | + | + |
| 455 | P50866 | <i>clpX</i>  | ATP-dependent Clp protease ATP-binding subunit ClpX        | + | + |
| 456 | P51831 | <i>fabG</i>  | 3-oxoacyl-[acyl-carrier-protein] reductase FabG            | + | - |
| 457 | P51835 | <i>ftsY</i>  | Cell division protein FtsY homolog                         | + | + |
| 458 | P52996 | <i>panB</i>  | 3-methyl-2-oxobutanoate hydroxymethyltransferase           | - | + |
| 459 | P52998 | <i>panC</i>  | Pantothenate synthetase                                    | - | + |
| 460 | P53001 | <i>aspB</i>  | Aspartate aminotransferase                                 | + | + |
| 461 | P53555 | <i>bioK</i>  | L-Lysine-8-amino-7-oxononanoate aminotransferase           | + | + |
| 462 | P54154 | <i>msrA</i>  | Peptide methionine sulfoxide reductase MsrA                | + | + |
| 463 | P54157 | <i>bcsA</i>  | Putative chalcone synthase                                 | + | + |
| 464 | P54164 | <i>ypeP</i>  | Uncharacterized protein ypeP                               | - | + |
| 465 | P54169 | <i>ypgR</i>  | Uncharacterized protein ypgR                               | + | - |
| 466 | P54178 | <i>ypmQ</i>  | SCO1 protein homolog                                       | + | + |
| 467 | P54375 | <i>sodA</i>  | Superoxide dismutase [Mn]                                  | + | + |
| 468 | P54376 | <i>gcvPA</i> | Probable glycine dehydrogenase [decarboxylating] subunit 1 | + | + |
| 469 | P54377 | <i>gcvPB</i> | Probable glycine dehydrogenase [decarboxylating] subunit 2 | + | + |
| 470 | P54378 | <i>gcvT</i>  | Aminomethyltransferase                                     | + | + |
| 471 | P54380 | <i>glyQ</i>  | Glycine--tRNA ligase alpha subunit                         | + | + |
| 472 | P54381 | <i>glyS</i>  | Glycine--tRNA ligase beta subunit                          | - | + |
| 473 | P54382 | <i>folD</i>  | Bifunctional protein FolD                                  | + | + |
| 474 | P54394 | <i>dinG</i>  | Probable ATP-dependent helicase dinG homolog               | - | + |
| 475 | P54418 | <i>pckA</i>  | Phosphoenolpyruvate carboxykinase [ATP]                    | + | - |
| 476 | P54419 | <i>metK</i>  | S-adenosylmethionine synthase                              | + | + |
| 477 | P54430 | <i>yrkC</i>  | Uncharacterized protein yrkC                               | - | + |

|     |        |              |                                                           |   |   |
|-----|--------|--------------|-----------------------------------------------------------|---|---|
| 478 | P54448 | <i>yqeC</i>  | Putative 6-phosphogluconate dehydrogenase YqeC            | + | + |
| 479 | P54452 | <i>yqeG</i>  | Uncharacterized protein yqeG                              | + | - |
| 480 | P54453 | <i>yqeH</i>  | Uncharacterized protein yqeH                              | + | + |
| 481 | P54456 | <i>yqeK</i>  | Uncharacterized protein yqeK                              | + | + |
| 482 | P54466 | <i>yqfA</i>  | UPF0365 protein yqfA                                      | + | + |
| 483 | P54472 | <i>yqfO</i>  | UPF0135 protein yqfO                                      | + | + |
| 484 | P54475 | <i>cshB</i>  | DEAD-box ATP-dependent RNA helicase CshB                  | + | + |
| 485 | P54481 | <i>yqfX</i>  | Uncharacterized protein yqfX                              | + | + |
| 486 | P54488 | <i>yqgF</i>  | Uncharacterized protein yqgF                              | + | - |
| 487 | P54495 | <i>glcK</i>  | Glucokinase                                               | + | + |
| 488 | P54509 | <i>yqhH</i>  | Uncharacterized ATP-dependent helicase yqhH               | + | + |
| 489 | P54510 | <i>yqhL</i>  | Uncharacterized protein yqhL                              | + | + |
| 490 | P54511 | <i>lipM</i>  | Octanoyltransferase LipM                                  | - | + |
| 491 | P54518 | <i>yqhT</i>  | Uncharacterized peptidase yqhT                            | + | + |
| 492 | P54524 | <i>yqiG</i>  | Probable NADH-dependent flavin oxidoreductase yqiG        | + | + |
| 493 | P54531 | <i>yqiT</i>  | Leucine dehydrogenase                                     | + | + |
| 494 | P54532 | <i>buk</i>   | Probable butyrate kinase                                  | + | - |
| 495 | P54535 | <i>artP</i>  | Arginine-binding extracellular protein ArtP               | + | + |
| 496 | P54536 | <i>artQ</i>  | Arginine transport system permease protein ArtQ           | + | - |
| 497 | P54542 | <i>yqjE</i>  | Uncharacterized protein yqjE                              | + | - |
| 498 | P54543 | <i>yqjF</i>  | Uncharacterized protein yqjF                              | - | + |
| 499 | P54547 | <i>zwf</i>   | Glucose-6-phosphate 1-dehydrogenase                       | + | + |
| 500 | P54550 | <i>namA</i>  | NADPH dehydrogenase                                       | + | + |
| 501 | P54569 | <i>yqkF</i>  | Uncharacterized oxidoreductase YqkF                       | + | - |
| 502 | P54586 | <i>yhcB</i>  | Uncharacterized protein yhcB                              | + | - |
| 503 | P54587 | <i>yhcC</i>  | Uncharacterized protein yhcC                              | + | - |
| 504 | P54597 | <i>yhcM</i>  | Uncharacterized protein yhcM                              | + | + |
| 505 | P54598 | <i>yhcN</i>  | Lipoprotein yhcN                                          | + | + |
| 506 | P54601 | <i>yhcQ</i>  | Spore coat protein F-like protein YhcQ                    | + | + |
| 507 | P54607 | <i>yhcW</i>  | Uncharacterized protein YhcW                              | + | + |
| 508 | P54608 | <i>yhcX</i>  | UPF0012 hydrolase yhcX                                    | + | + |
| 509 | P54616 | <i>fabI</i>  | Enoyl-[acyl-carrier-protein] reductase [NADH] FabI        | + | + |
| 510 | P54721 | <i>catE</i>  | Catechol-2,3-dioxygenase                                  | - | + |
| 511 | P54944 | <i>yxeE</i>  | Uncharacterized protein yxeE                              | - | + |
| 512 | P54947 | <i>yxeH</i>  | Uncharacterized protein YxeH                              | + | - |
| 513 | P55179 | <i>pepT</i>  | Peptidase T                                               | + | + |
| 514 | P55180 | <i>galE</i>  | UDP-glucose 4-epimerase                                   | + | + |
| 515 | P55342 | <i>bshC</i>  | UPF0747 protein yIIA                                      | + | + |
| 516 | P55872 | <i>infC</i>  | Translation initiation factor IF-3                        | + | + |
| 517 | P55874 | <i>rpmI</i>  | 50S ribosomal protein L35                                 | - | + |
| 518 | P68569 | <i>bdbA</i>  | SPBc2 prophage-derived disulfide bond formation protein A | + | - |
| 519 | P70945 | <i>yitS</i>  | DegV domain-containing protein yitS                       | - | + |
| 520 | P70974 | <i>rplM</i>  | 50S ribosomal protein L13                                 | + | + |
| 521 | P70998 | <i>speE</i>  | Spermidine synthase                                       | + | + |
| 522 | P70999 | <i>speB</i>  | Agmatinase                                                | - | + |
| 523 | P71009 | <i>albC</i>  | Putative ABC transporter ATP-binding protein AlbC         | - | + |
| 524 | P71012 | <i>fruA</i>  | PTS system fructose-specific EIIABC component             | + | + |
| 525 | P71013 | <i>sipT</i>  | Signal peptidase I T                                      | + | - |
| 526 | P71014 | <i>bslA</i>  | Uncharacterized protein yuaB                              | + | - |
| 527 | P71018 | <i>plsX</i>  | Phosphate acyltransferase                                 | + | + |
| 528 | P71079 | <i>fabL</i>  | Enoyl-[acyl-carrier-protein] reductase [NADPH] FabL       | + | + |
| 529 | P71084 | <i>gsaB</i>  | Glutamate-1-semialdehyde 2,1-aminomutase 2                | + | + |
| 530 | P71088 | <i>spo0M</i> | Sporulation-control protein spo0M                         | + | + |
| 531 | P80239 | <i>ahpC</i>  | Alkyl hydroperoxide reductase subunit C                   | + | + |

|     |        |              |                                                                       |   |   |
|-----|--------|--------------|-----------------------------------------------------------------------|---|---|
| 532 | P80244 | <i>clpP</i>  | ATP-dependent Clp protease proteolytic subunit                        | + | + |
| 533 | P80700 | <i>tsf</i>   | Elongation factor Ts                                                  | + | + |
| 534 | P80859 | <i>gndA</i>  | 6-phosphogluconate dehydrogenase, decarboxylating 2                   | + | + |
| 535 | P80860 | <i>pgi</i>   | Glucose-6-phosphate isomerase                                         | + | + |
| 536 | P80862 | <i>serC</i>  | Phosphoserine aminotransferase                                        | + | - |
| 537 | P80864 | <i>tpx</i>   | Probable thiol peroxidase                                             | - | + |
| 538 | P80865 | <i>sucD</i>  | Succinyl-CoA ligase [ADP-forming] subunit alpha                       | - | + |
| 539 | P80866 | <i>sufC</i>  | Vegetative protein 296                                                | + | - |
| 540 | P80868 | <i>fusA</i>  | Elongation factor G                                                   | + | + |
| 541 | P80879 | <i>dps</i>   | General stress protein 20U                                            | + | + |
| 542 | P80880 | <i>trxB</i>  | Thioredoxin reductase                                                 | + | + |
| 543 | P80885 | <i>pyk</i>   | Pyruvate kinase                                                       | + | + |
| 544 | P80886 | <i>sucC</i>  | Succinyl-CoA ligase [ADP-forming] subunit beta                        | + | + |
| 545 | P94358 | <i>aldY</i>  | Uncharacterized aldehyde dehydrogenase AldY                           | + | + |
| 546 | P94360 | <i>msmX</i>  | Maltodextrin import ATP-binding protein MsmX                          | + | - |
| 547 | P94377 | <i>katX</i>  | Catalase X                                                            | + | + |
| 548 | P94391 | <i>putC</i>  | 1-pyrroline-5-carboxylate dehydrogenase 2                             | + | + |
| 549 | P94434 | <i>ycnL</i>  | Uncharacterized protein ycnL                                          | + | - |
| 550 | P94446 | <i>coxA</i>  | Sporulation cortex protein CoxA                                       | + | - |
| 551 | P94464 | <i>rsmB</i>  | Ribosomal RNA small subunit methyltransferase B                       | + | + |
| 552 | P94478 | <i>hflX</i>  | GTPase HflX                                                           | + | + |
| 553 | P94479 | <i>ynbB</i>  | Uncharacterized protein ynbB                                          | + | - |
| 554 | P94494 | <i>alr2</i>  | Alanine racemase 2                                                    | + | - |
| 555 | P94512 | <i>ysaA</i>  | Putative uncharacterized hydrolase ysaA                               | - | + |
| 556 | P94520 | <i>ysdB</i>  | Sigma-w pathway protein ysdB                                          | + | - |
| 557 | P94521 | <i>ysdC</i>  | Putative aminopeptidase ysdC                                          | + | + |
| 558 | P94531 | <i>abfA</i>  | Alpha-N-arabinofuranosidase 1                                         | - | + |
| 559 | P94544 | <i>polX</i>  | DNA polymerase/3'-5' exonuclease PolX                                 | + | - |
| 560 | P94545 | <i>mutSB</i> | MutS2 protein                                                         | + | + |
| 561 | P94552 | <i>abf2</i>  | Alpha-N-arabinofuranosidase 2                                         | + | - |
| 562 | P94559 | <i>ysnB</i>  | Putative metallophosphoesterase ysnB                                  | - | + |
| 563 | P94573 | <i>ywoC</i>  | Uncharacterized isochorismatase family protein ywoC                   | + | + |
| 564 | P94584 | <i>fabZ</i>  | (3R)-hydroxymyristoyl-[acyl-carrier-protein] dehydratase              | + | + |
| 565 | P96583 | <i>topB</i>  | DNA topoisomerase 3                                                   | + | - |
| 566 | P96612 | <i>ddl</i>   | D-alanine--D-alanine ligase                                           | + | + |
| 567 | P96614 | <i>cshA</i>  | DEAD-box ATP-dependent RNA helicase CshA                              | + | + |
| 568 | P97032 | <i>yhbD</i>  | Uncharacterized protein yhbD                                          | + | - |
| 569 | Q01464 | <i>minD</i>  | Septum site-determining protein MinD                                  | - | + |
| 570 | Q01465 | <i>mreB</i>  | Rod shape-determining protein MreB                                    | + | + |
| 571 | Q01466 | <i>mreC</i>  | Rod shape-determining protein mreC                                    | + | - |
| 572 | Q01625 | <i>misCA</i> | Membrane protein insertase MisCA                                      | + | - |
| 573 | Q03222 | <i>rho</i>   | Transcription termination factor Rho                                  | + | + |
| 574 | Q03522 | <i>murD</i>  | UDP-N-acetylmuramoylalanine--D-glutamate ligase                       | + | + |
| 575 | Q03523 | <i>murE</i>  | UDP-N-acetylmuramoyl-L-alanyl-D-glutamate--2,6-diaminopimelate ligase | + | - |
| 576 | Q04796 | <i>dapA</i>  | Dihydrodipicolinate synthase                                          | + | + |
| 577 | Q04797 | <i>asd</i>   | Aspartate-semialdehyde dehydrogenase                                  | - | + |
| 578 | Q04805 | <i>ymxG</i>  | Uncharacterized zinc protease ymxG                                    | + | + |
| 579 | Q05852 | <i>gtbB</i>  | UTP--glucose-1-phosphate uridylyltransferase                          | + | + |
| 580 | Q05873 | <i>valS</i>  | Valine--tRNA ligase                                                   | + | + |
| 581 | Q06752 | <i>cysS</i>  | Cysteine--tRNA ligase                                                 | + | + |
| 582 | Q06797 | <i>rplA</i>  | 50S ribosomal protein L1                                              | + | + |
| 583 | Q07876 | <i>rsmH</i>  | Ribosomal RNA small subunit methyltransferase H                       | + | + |
| 584 | Q08311 | <i>cotY</i>  | Spore coat protein Y                                                  | + | + |

|     |        |              |                                                              |   |   |
|-----|--------|--------------|--------------------------------------------------------------|---|---|
| 585 | Q08313 | <i>cotX</i>  | Spore coat protein X                                         | + | + |
| 586 | Q08352 | <i>ald</i>   | Alanine dehydrogenase                                        | + | + |
| 587 | Q08432 | <i>patB</i>  | Cystathionine beta-lyase PatB                                | + | + |
| 588 | Q45064 | <i>plsY</i>  | Glycerol-3-phosphate acyltransferase                         | + | - |
| 589 | Q45066 | <i>parC</i>  | DNA topoisomerase 4 subunit A                                | + | - |
| 590 | Q45477 | <i>ileS</i>  | Isoleucine--tRNA ligase                                      | + | + |
| 591 | Q45480 | <i>ylyB</i>  | Uncharacterized RNA pseudouridine synthase ylyB              | - | + |
| 592 | Q45493 | <i>rnjA</i>  | Ribonuclease J 1                                             | + | + |
| 593 | Q45494 | <i>ykrA</i>  | Putative phosphatase YkrA                                    | - | + |
| 594 | Q45498 | <i>yktB</i>  | UPF0637 protein yktB                                         | + | + |
| 595 | Q45499 | <i>suhB</i>  | Inositol-1-monophosphatase                                   | + | + |
| 596 | Q45538 | <i>cotJC</i> | Protein CotJC                                                | - | + |
| 597 | Q45604 | <i>yycR</i>  | Uncharacterized zinc-type alcohol dehydrogenase-like protein | + | + |
| 598 | Q795M6 | <i>yugH</i>  | Putative aminotransferase YugH                               | + | - |
| 599 | Q795R8 | <i>ytfP</i>  | Uncharacterized protein ytfP                                 | + | + |
| 600 | Q795U4 | <i>ytkL</i>  | UPF0173 metal-dependent hydrolase ytkL                       | - | + |
| 601 | Q796Q1 | <i>yitG</i>  | Uncharacterized MFS-type transporter yitG                    | + | + |
| 602 | Q99171 | <i>tepA</i>  | Translocation-enhancing protein TepA                         | + | + |
| 603 | Q9KWU4 | <i>pyc</i>   | Pyruvate carboxylase                                         | + | + |

<sup>a</sup> Sample was detected in dormant spores.

<sup>b</sup> Sample was detected in germinated spores



**Table S3: *B. subtilis* and *B. anthracis* spore membrane-associated proteins identified by mass spectrometry.**

| Gene <sup>a</sup>      | COG Functional category             | <i>B. subtilis</i><br>Uniprot<br>number | <i>B. anthracis</i><br>Uniprot<br>number | Membrane<br>prediction <sup>b</sup> | Previous ID <sup>c</sup> |                        | Regulon <sup>d</sup> |
|------------------------|-------------------------------------|-----------------------------------------|------------------------------------------|-------------------------------------|--------------------------|------------------------|----------------------|
|                        |                                     |                                         |                                          |                                     | Spore<br>Proteome        | Vegetative<br>Proteome |                      |
| <i>ythA/cydA3</i>      | Energy production                   | C0SP90                                  | Q81WZ0                                   | Integral                            | B C                      |                        | $\sigma^G$           |
| <i>yhfQ</i>            | Ion transport & metab. <sup>e</sup> | C0SP94                                  |                                          | Lipoprotein                         | B C                      | F H I                  |                      |
| <i>yugS/ GBAA_0608</i> | Unknown                             | O05241                                  | Q81V91                                   | Integral                            | B C                      |                        |                      |
| <i>yugP</i>            | Posttranslational modification      | O05248                                  |                                          | Integral                            | B C                      | G I                    |                      |
| <i>yvcA</i>            | Colony structure                    | O06965                                  |                                          | Lipoprotein                         | C                        | G I                    |                      |
| <i>yveA</i>            | Amino acid transport & metab.       | O07002                                  |                                          | Integral                            | B C                      |                        | $\sigma^G$           |
| <i>yheB</i>            | Unknown                             | O07543                                  |                                          | Integral                            | B C                      | F I                    |                      |
| <i>ylaJ/ GBAA_2746</i> | Unknown                             | O07634                                  | Q81PQ5                                   | Lipoprotein                         | A B C E                  | E I                    | $\sigma^G$           |
| <i>yetF/BAS4999</i>    | Unknown                             | O31533                                  | Q81X64                                   | Integral                            | B C                      |                        | $\sigma^F$           |
| <i>yhbJ</i>            | Defense mechanisms                  | O31593                                  |                                          | Integral                            | B C                      | G I                    | $\sigma^G$           |
| <i>yjbQ</i>            | Ion transport & metab.              | O31615                                  |                                          | Integral                            | C                        | I                      |                      |
| <i>ykrK/ GBAA_2841</i> | Unknown                             | O31656                                  | Q81PG5                                   | Peripheral                          | C                        |                        |                      |
| <i>htpX</i>            | Posttranslational modification      | O31657                                  |                                          | Integral                            | B C                      | H I                    |                      |
| <i>yndM/BAS2909</i>    | Unknown                             | O31816                                  | Q6HWX1                                   | Integral                            | B C                      |                        |                      |
| <i>yrvD</i>            | Unknown                             | O32045                                  |                                          | Integral                            | C                        | G I                    |                      |
| <i>secDF</i>           | Intracellular trafficking           | O32047                                  | Q81LH8                                   | Integral                            | B C                      | F H I J                |                      |
| <i>yrbG</i>            | Unknown                             | O32050                                  |                                          | Integral                            | B C                      |                        | $\sigma^G$           |
| <i>yrbF</i>            | Intracellular trafficking           | O32052                                  |                                          | Integral                            | B C                      | H I                    |                      |
| <i>yuaG</i>            | Unknown                             | O32076                                  |                                          | Integral                            | B C                      | G H I                  |                      |
| <i>yutC/ GBAA_5199</i> | Unknown                             | O32128                                  | Q81XN4                                   | Lipoprotein                         | B C                      |                        | $\sigma^G$           |
| <i>metQ/ GBAA_5220</i> | Amino acid transport & metab.       | O32167                                  | Q81XL5                                   | Lipoprotein                         | B C                      | H I                    |                      |
| <i>bdbD</i>            | Posttranslational modification      | O32218                                  | Q81YT8                                   | Integral                            | B C                      | F H I                  | $\sigma^E$           |
| <i>yfmC/fpuA</i>       | Ion transport & metab.              | O34348                                  | Q81L65                                   | Lipoprotein                         | B C                      | F H I J                |                      |
| <i>yblL</i>            | Signal transduction                 | O34470                                  |                                          | Integral                            | B C                      | F H                    |                      |

|                       |                                |        |        |             |       |         |            |
|-----------------------|--------------------------------|--------|--------|-------------|-------|---------|------------|
| <i>prkC</i>           | Germination                    | O34507 |        | Integral    | B C   | G H I   |            |
| <i>sppA</i>           | Intracellular trafficking      | O34525 |        | Integral    | B C   | G H I   |            |
| <i>ylbC</i>           | Unknown                        | O34586 |        | Integral    | B C   | G I     | $\sigma^F$ |
| <i>yerH</i>           | Unknown                        | O34629 |        | Lipoprotein | B C   | F H I   |            |
| <i>yodI</i>           | Unknown                        | O34654 |        | Integral    | A B C |         | $\sigma^K$ |
| <i>yfiS</i>           | Ion transport & metab.         | O34726 |        | Integral    | B C   |         |            |
| <i>lgt</i>            | Posttranslational modification | O34752 |        | Integral    | B C   | G I     |            |
| <i>chaA</i>           | Ion transport & metab.         | O34840 |        | Integral    | B C   | I       |            |
| <i>ezrA</i>           | Cell cycle control             | O34894 |        | Integral    | B C   | G H I   |            |
| <i>znuA/GBAA_2035</i> | Ion transport & metab.         | O34966 | Q81RK9 | Lipoprotein | B C   | H       |            |
| <i>yerB</i>           | Unknown                        | O34968 |        | Lipoprotein |       |         |            |
| <i>pbuG</i>           | General transporter            | O34987 |        | Integral    | C     | F I     |            |
| <i>yfkR</i>           | Germination                    | O35028 |        | Lipoprotein | B C   |         | $\sigma^G$ |
| <i>gerAC</i>          | Germination                    | P07870 |        | Lipoprotein | B     |         | $\sigma^G$ |
| <i>dacA</i>           | Cell wall biogenesis           | P08750 |        | Integral    | B C   | F H I   |            |
| <i>secY/secY1</i>     | Intracellular trafficking      | P16336 | Q81VR0 | Integral    | B C   | F H I   |            |
| <i>gerD</i>           | Germination                    | P16450 | Q81VP4 | Lipoprotein | B C   |         | $\sigma^G$ |
| <i>ptsG/ptsG</i>      | Carbohydrate transp. & metab.  | P20166 | Q81MH9 | Integral    | B C   | F H I   |            |
| <i>phoR</i>           | Signal transduction            | P23545 |        | Integral    | B C   | H I     | $\sigma^E$ |
| <i>oppD/GBAA_1194</i> | General Transporter            | P24136 | Q81TS1 | Peripheral  | B C   | G H I J |            |
| <i>oppF/GBAA_1195</i> | Amino acid transport & metab.  | P24137 | Q81TS0 | Peripheral  | B C   | G H I   |            |
| <i>oppB/GBAA_1192</i> | General Transporter            | P24138 | Q81TS3 | Integral    | B C   | G H I J |            |
| <i>oppC/GBAA_1193</i> | General Transporter            | P24139 | Q81TS2 | Integral    | B C   | G H I   |            |
| <i>oppA/GBAA_0656</i> | Amino acid transport & metab.  | P24141 | Q81V45 | Lipoprotein | B C   | F H I J |            |
| <i>prsA/prsA1</i>     | Posttranslational modification | P24327 | Q81U45 | Lipoprotein | B C   | F H I   |            |
| <i>sipS</i>           | Intracellular trafficking      | P28628 |        | Integral    | B C   | G I     | $\sigma^E$ |
| <i>spoVAF</i>         | DPA transport                  | P31845 | Q81MG2 | Integral    | B C   |         | $\sigma^G$ |
| <i>qoxA/ctaC</i>      | Energy production              | P34957 | Q81MT9 | Integral    | B C   | F H I   |            |

|                       |                                |        |        |             |       |         |            |
|-----------------------|--------------------------------|--------|--------|-------------|-------|---------|------------|
| <i>resA</i>           | Posttranslational modification | P35160 | Q81SZ9 | Integral    | C     | G I     |            |
| <i>rbsA</i>           | Carbohydrate transp. & metab.  | P36947 |        | Peripheral  |       | F       |            |
| <i>ftsH</i>           | Posttranslational modification | P37476 | Q81VX5 | Integral    | B C   | F H I J |            |
| <i>yacD</i>           | Posttranslational modification | P37566 |        | Integral    | C     | F I     |            |
| <i>fhuD/GBAA_0351</i> | Ion transport & metab.         | P37580 | Q81ZB8 | Integral    | B C   | F H I J |            |
| <i>murG</i>           | Cell wall biogenesis           | P37585 |        | Peripheral  | B C   | I       | $\sigma^E$ |
| <i>atpD</i>           | Energy production              | P37809 | Q81JZ5 | Peripheral  | B C D | F H I   |            |
| <i>atpG</i>           | Energy production              | P37810 | Q81JZ4 | Peripheral  | B C   | F H I   |            |
| <i>atpB</i>           | Energy production              | P37813 |        | Integral    | C     | F I     |            |
| <i>atpF</i>           | Energy production              | P37814 | Q81JZ1 | Integral    | B C   | F H I   |            |
| <i>pbpF/GBAA_1474</i> | Cell wall biogenesis           | P38050 | Q81T17 | Integral    | B C   | G J     |            |
| <i>ypeB</i>           | Germination                    | P38490 | Q81PQ4 | Integral    | B C   |         | $\sigma^G$ |
| <i>gerBC</i>          | Germination                    | P39571 |        | Lipoprotein | B     |         | $\sigma^G$ |
| <i>dltD</i>           | Cell wall biogenesis           | P39578 |        | Integral    | C     | F H I   |            |
| <i>yyxA/GBAA_5710</i> | Posttranslational modification | P39668 | Q81JJ5 | Integral    | B C   |         |            |
| <i>ponA/GBAA_2345</i> | Cell wall biogenesis           | P39793 | Q81QS3 | Integral    | B C   | F H I   |            |
| <i>ytxG</i>           | Unknown                        | P40779 |        | Integral    | B C   | G H I   |            |
| <i>ytxH</i>           | Unknown                        | P40780 |        | Integral    | B C   | G H I   |            |
| <i>spoVAC</i>         | DPA transport                  | P40868 | Q81X68 | Integral    | B C   | H       | $\sigma^G$ |
| <i>spoVAD</i>         | DPA transport                  | P40869 | Q81X67 | Peripheral  | B C   | H       | $\sigma^G$ |
| <i>era</i>            | Unknown                        | P42182 | Q81LT7 | Peripheral  | B C E | H I     |            |
| <i>tcyA/GBAA_0855</i> | Amino acid transport & metab.  | P42199 | Q81UL3 | Lipoprotein | B C E | H I     |            |
| <i>yckB</i>           | Amino acid transport & metab.  | P42400 |        | Lipoprotein |       | F H I   |            |
| <i>tagG</i>           | Cell wall biogenesis           | P42953 |        | Integral    | B     | G       |            |
| <i>ahpF</i>           | Posttranslational modification | P42974 | Q81ZC5 | Peripheral  | B C   | G H I   |            |
| <i>clsB</i>           | Lipid metabolism               | P45865 |        | Integral    | B C   |         | $\sigma^G$ |
| <i>yqaR</i>           | Unknown                        | P45914 |        | Integral    |       | I       |            |
| <i>qcrA</i>           | Energy production              | P46911 | Q81SV1 | Integral    | B C   | G H I   |            |

|                       |                               |        |        |             |       |         |                         |
|-----------------------|-------------------------------|--------|--------|-------------|-------|---------|-------------------------|
| <i>qcrB</i>           | Energy production             | P46912 | Q81SV0 | Integral    | B C   | G H I   |                         |
| <i>opuAB</i>          | Amino acid transport & metab. | P46921 |        | Integral    | B C   | G H I   |                         |
| <i>opuAC</i>          | Amino acid transport & metab. | P46922 |        | Lipoprotein | B C   | F H I   |                         |
| <i>gerKC</i>          | Germination                   | P49941 |        | Lipoprotein | B C   |         | $\sigma^G$              |
| <i>ftsY</i>           | Intracellular trafficking     | P51835 |        | Peripheral  | B C   | G H I   | $\sigma^K$              |
| <i>ypmQ/GBAA_2249</i> | Energy production             | P54178 | Q81R11 | Lipoprotein |       |         |                         |
| <i>yqfA</i>           | Unknown                       | P54466 |        | Integral    | B C   | F H I   |                         |
| <i>yqfXIBA_1410</i>   | Unknown                       | P54481 | Q81T77 | Integral    | B C E | H       | $\sigma^G$              |
| <i>yqgF</i>           | Cell wall biogenesis          | P54488 |        | Integral    | C     | I       |                         |
| <i>artP/GBAA_0367</i> | Amino acid transport & metab. | P54535 | Q6I447 | Lipoprotein | B C   | H I     |                         |
| <i>artQ</i>           | Amino acid transport & metab. | P54536 |        | Integral    | B C   | H I     |                         |
| <i>yhcC</i>           | Unknown                       | P54587 |        | Integral    | B C   |         | $\sigma^G$              |
| <i>yhcM</i>           | Unknown                       | P54597 |        | Integral    | A B C |         | $\sigma^F$              |
| <i>yhcN</i>           | Germination                   | P54598 |        | Lipoprotein | B C   | G       | $\sigma^F$ & $\sigma^G$ |
| <i>fruA</i>           | Carbohydrate transp. & metab. | P71012 |        | Integral    | B C   | F H I   |                         |
| <i>sipT</i>           | Intracellular trafficking     | P71013 |        | Integral    | B C   | G I     |                         |
| <i>yuaB</i>           | Colony structure              | P71014 |        | Integral    |       |         |                         |
| <i>msmX/potA</i>      | Amino acid transport & metab. | P94360 | Q81TH8 | Peripheral  | B C   | G H I J |                         |
| <i>ycnL</i>           | Ion transport & metab.        | P94434 |        | Integral    | B C   |         |                         |
| <i>ysdB</i>           | Transcription                 | P94520 |        | Integral    | C     | G I     |                         |
| <i>misCA/yidC2</i>    | Intracellular trafficking     | Q01625 | Q81JH1 | Integral    | B C   | H I     |                         |
| <i>lytR</i>           | Transcription                 | Q02115 | Q81K33 | Integral    | B C   | F H I   |                         |
| <i>plsY/plsY3</i>     | Lipid metabolism              | Q45064 | Q81Y92 | Integral    | B C   | I       |                         |
| <i>yitG</i>           | General transporter           | Q796Q1 |        | Integral    | B C   |         | $\sigma^G$              |
| BAS4994               | Unknown                       |        | Q6HR05 | Lipoprotein |       |         |                         |
| GBAA_5330             | Ion transport & metab.        |        | Q81XB0 | Lipoprotein |       |         |                         |
| BAS4323               | Unknown                       |        | Q6HSW8 | Lipoprotein | E     |         |                         |
| BAS0569               | Unknown                       |        | Q6I3I4 | Lipoprotein |       |         |                         |

|                  |                               |  |        |             |   |   |  |
|------------------|-------------------------------|--|--------|-------------|---|---|--|
| <i>fabF</i>      | Lipid metabolism              |  | Q81JF9 | Peripheral  |   |   |  |
| <i>GBAA_5684</i> | Cell wall biogenesis          |  | Q81JM0 | Integral    |   |   |  |
| <i>GBAA_5061</i> | Unknown                       |  | Q81KD9 | Peripheral  | D |   |  |
| <i>GBAA_4746</i> | Unknown                       |  | Q81L82 | Lipoprotein |   |   |  |
| <i>psd</i>       | Lipid metabolism              |  | Q81LP7 | Peripheral  |   |   |  |
| <i>cccA</i>      | Energy production             |  | Q81LU6 | Integral    |   |   |  |
| <i>BA_4310</i>   | Unknown                       |  | Q81MD9 | Lipoprotein |   |   |  |
| <i>GBAA_4229</i> | Carbohydrate transp. & metab. |  | Q81ML8 | Lipoprotein | E |   |  |
| <i>typA</i>      | Signal transduction           |  | Q81MS8 | Peripheral  |   |   |  |
| <i>GBAA_3380</i> | Energy production             |  | Q81N37 | Peripheral  |   |   |  |
| <i>GBAA_3129</i> | Unknown                       |  | Q81NQ0 | Peripheral  | D |   |  |
| <i>GBAA_3048</i> | Defense mechanisms            |  | Q81NX4 | Peripheral  |   | J |  |
| <i>GBAA_2961</i> | Unknown                       |  | Q81P56 | Integral    |   |   |  |
| <i>GBAA_2942</i> | Unknown                       |  | Q81P74 | Lipoprotein | E |   |  |
| <i>GBAA_2883</i> | Unknown                       |  | Q81PC7 | Lipoprotein |   |   |  |
| <i>proV2</i>     | Amino acid transport & metab. |  | Q81PL6 | Peripheral  |   |   |  |
| <i>GBAA_1523</i> | Unknown                       |  | Q81SX1 | Integral    |   |   |  |
| <i>potD</i>      | Amino acid transport & metab. |  | Q81TH5 | Lipoprotein |   |   |  |
| <i>ecsA</i>      | Defense mechanisms            |  | Q81U40 | Peripheral  |   |   |  |
| <i>GBAA_0615</i> | Ion transport & metab.        |  | Q81V85 | Lipoprotein |   | J |  |
| <i>GBAA_0595</i> | Ion transport & metab.        |  | Q81VA3 | Integral    |   |   |  |
| <i>GBAA_0190</i> | Unknown                       |  | Q81VK7 | Lipoprotein | E |   |  |
| <i>ftsY</i>      | Intracellular trafficking     |  | Q81WJ0 | Peripheral  |   |   |  |
| <i>ffh</i>       | Intracellular trafficking     |  | Q81WJ2 | Peripheral  |   |   |  |
| <i>rasP</i>      | Cell envelope biogenesis      |  | Q81WL5 | Integral    |   |   |  |
| <i>GBAA_3927</i> | Unknown                       |  | Q81WP4 | Lipoprotein |   |   |  |
| <i>GBAA_5313</i> | Energy production             |  | Q81XC7 | Peripheral  |   |   |  |
| <i>GBAA_5237</i> | Unknown                       |  | Q81XK0 | Lipoprotein |   |   |  |

|                  |                                |  |        |             |   |  |  |
|------------------|--------------------------------|--|--------|-------------|---|--|--|
| <i>GBAA_5173</i> | Energy production              |  | Q81XR0 | Peripheral  |   |  |  |
| <i>BA_5160</i>   | Posttranslational modification |  | Q81XS0 | Peripheral  |   |  |  |
| <i>GBAA_5159</i> | Energy production              |  | Q81XS1 | Peripheral  |   |  |  |
| <i>BA_3742</i>   | Unknown                        |  | Q81Y17 | Integral    |   |  |  |
| <i>GBAA_0418</i> | Unknown                        |  | Q81Z55 | Peripheral  | E |  |  |
| <i>GBAA_0382</i> | Ion transport & metab.         |  | Q81Z90 | Lipoprotein |   |  |  |
| <i>GBAA_0374</i> | Unknown                        |  | Q81Z98 | Integral    |   |  |  |
| <i>GBAA_0365</i> | Energy production              |  | Q81ZA6 | Peripheral  |   |  |  |

<sup>a</sup> If a protein doesn't have an annotated gene name, the ordered locus name is listed.

<sup>b</sup> Mechanism of membrane association predicted as described in Materials and Methods.

<sup>c</sup> Previous identification of the protein in a proteomic analysis: A=(1); B=(2); C=(3); D=(4); E=(5); F=(6); G=(7); H=(2); I=(3); J=(8).

<sup>d</sup> Sigma factor dependence was drawn from references: (1, 9-11).

<sup>e</sup> metabolism

**Table S4. Spore membrane proteins that were no longer detected following germination.**

| <b>Gene</b>           | <b><i>B. subtilis</i><br/>Uniprot<br/>number</b> | <b><i>B. anthracis</i><br/>Uniprot<br/>number</b> |
|-----------------------|--------------------------------------------------|---------------------------------------------------|
| <i>artQ</i>           | P54536                                           |                                                   |
| <i>atpB</i>           | P37813                                           |                                                   |
| <i>bdbD</i>           | O32218                                           | Q81YT8                                            |
| <i>clsB</i>           | P45865                                           |                                                   |
| <i>dltD</i>           | P39578                                           |                                                   |
| <i>ezrA</i>           | O34894                                           |                                                   |
| <i>htpX</i>           | O31657                                           |                                                   |
| <i>lgt</i>            | O34752                                           |                                                   |
| <i>lytR</i>           | Q02115                                           | Q81K33                                            |
| <i>misCA</i>          | Q01625                                           |                                                   |
| <i>msmX/potA</i>      | P94360                                           | Q81TH8                                            |
| <i>oppB/GBAA_1192</i> | P24138                                           | Q81TS3                                            |
| <i>opuAC</i>          | P46922                                           |                                                   |
| <i>pbpF/GBAA_1474</i> | P38050                                           | Q81T17                                            |
| <i>pbuG</i>           | O34987                                           |                                                   |
| <i>phoR</i>           | P23545                                           |                                                   |
| <i>plsY/plsY3</i>     | Q45064                                           | Q81Y92                                            |
| <i>ponA/GBAA_2345</i> | P39793                                           | Q81QS3                                            |
| <i>qcrA</i>           | P46911                                           |                                                   |
| <i>rbsB</i>           | P36949                                           |                                                   |
| <i>resA</i>           | P35160                                           | Q81SZ9                                            |
| <i>secY</i>           | P16336                                           | Q81VR0                                            |
| <i>sipS</i>           | P28628                                           |                                                   |
| <i>sipT</i>           | P71013                                           |                                                   |
| <i>sppA</i>           | O34525                                           |                                                   |
| <i>tagG</i>           | P42953                                           |                                                   |
| <i>yacD</i>           | P37566                                           |                                                   |
| <i>ybC</i>            | O34586                                           |                                                   |
| <i>yckB</i>           | P42400                                           |                                                   |
| <i>ycnL</i>           | P94434                                           |                                                   |
| <i>yerB</i>           | O34968                                           |                                                   |
| <i>yerH</i>           | O34629                                           |                                                   |
| <i>chaA</i>           | O34840                                           |                                                   |
| <i>yfkR</i>           | O35028                                           |                                                   |
| <i>yhbJ</i>           | O31593                                           |                                                   |
| <i>yhcC</i>           | P54587                                           |                                                   |
| <i>yjbQ</i>           | O31615                                           |                                                   |
| <i>yblL</i>           | O34470                                           |                                                   |
| <i>yndM</i>           | O31816                                           |                                                   |
| <i>yqaR</i>           | P45914                                           |                                                   |
| <i>yqgF</i>           | P54488                                           |                                                   |

|                  |        |        |
|------------------|--------|--------|
| <i>yrbG</i>      | O32050 |        |
| <i>ysdB</i>      | P94520 |        |
| <i>ytxG</i>      | P40779 |        |
| <i>yuaB</i>      | P71014 |        |
| <i>yuaG</i>      | O32076 |        |
| <i>yutC</i>      | O32128 |        |
| <i>yvcA</i>      | O06965 |        |
| <i>GBAA_0351</i> |        | Q81ZB8 |
| <i>GBAA_0367</i> |        | Q6I447 |
| <i>GBAA_0374</i> |        | Q81Z98 |
| <i>GBAA_0382</i> |        | Q81Z90 |
| <i>GBAA_0595</i> |        | Q81VA3 |
| <i>GBAA_1193</i> |        | Q81TS2 |
| <i>GBAA_1194</i> |        | Q81TS1 |
| <i>GBAA_2035</i> |        | Q81RK9 |
| <i>GBAA_2249</i> |        | Q81R11 |
| <i>GBAA_2746</i> |        | Q81PQ5 |
| <i>GBAA_2841</i> |        | Q81PG5 |
| <i>GBAA_2883</i> |        | Q81PC7 |
| <i>GBAA_2942</i> |        | Q81P74 |
| <i>BAS2909</i>   |        | Q6HWX1 |
| <i>BA_4310</i>   |        | Q81MD9 |
| <i>GBAA_4746</i> |        | Q81L82 |
| <i>fpuA</i>      |        | Q81L65 |
| <i>GBAA_5061</i> |        | Q81KD9 |
| <i>GBAA_5173</i> |        | Q81XR0 |
| <i>GBAA_5199</i> |        | Q81XN4 |
| <i>GBAA_5220</i> |        | Q81XL5 |
| <i>GBAA_5237</i> |        | Q81XK0 |
| <i>GBAA_5330</i> |        | Q81XB0 |
| <i>BAS4994</i>   |        | Q6HR05 |
| <i>GBAA_5710</i> |        | Q81JJ5 |
| <i>ctaC</i>      |        | Q81MT9 |
| <i>ecsA</i>      |        | Q81U40 |
| <i>ffH</i>       |        | Q81WJ2 |
| <i>gerD</i>      |        | Q81VP4 |
| <i>ptsG</i>      |        | Q81MH9 |
| <i>qcrB</i>      |        | Q81SV0 |
| <i>rasP</i>      |        | Q81WL5 |
| <i>secDF</i>     |        | Q81LH8 |
| <i>spoVAC</i>    |        | Q81X68 |
| <i>spoVAF</i>    |        | Q81MG2 |
| <i>ypeB</i>      |        | Q81PQ4 |



**Table S5. Oligonucleotides used in this work.**

| <b>Name</b> | <b>Sequence (5'-3')</b>                       | <b>Use</b>                              |
|-------------|-----------------------------------------------|-----------------------------------------|
| DLP668      | AGTAGCCCGGCATTTTTAGC                          | PCR verification of $\Delta znuA$       |
| DLP669      | TAGCGGCCTGACTGAACAAG                          | PCR verification of $\Delta znuA$       |
| DLP670      | CCGAACCTTGCGCTGATGTC                          | PCR verification of $\Delta ycnL$       |
| DLP671      | GCCGCCTTGCTGCTGTTCTT                          | PCR verification of $\Delta ycnL$       |
| DLP672      | TCAAGCGGGTGCGGGTAAAT                          | PCR verification of $\Delta yflS$       |
| DLP673      | TGTATGCTGAACGGCTAACG                          | PCR verification of $\Delta yflS$       |
| DLP676      | GTTTCGCTTGGATTTTCATAA                         | PCR verification of $\Delta yloB$       |
| DLP677      | CACCCAATTCTTCCCTGTTC                          | PCR verification of $\Delta yloB$       |
| DLP687      | GATCCGACTGCCATTCCTGC                          | Construction of $\Delta chaA::spec$     |
| DLP688      | CAATAAACCTTGCCCTCGCTACGCAGAAAGCGGAACACCGGCC   | Construction of $\Delta chaA::spec$     |
| DLP689      | CGTTACGTTATTAGCGAGCCAGTCATGTCATTATGGCGATCGGC  | Construction of $\Delta chaA::spec$     |
| DLP690      | CCAGCCTTGCAAGTAAGACGG                         | Construction of $\Delta chaA::spec$     |
| DLP683      | ATCGGTACGCAGCTGGCGGC                          | Construction of $\Delta yugS::mls$      |
| DLP684      | CGATTATGTCTTTTGCGCAGTCGGCACCATAAATGGTAAGGGGCC | Construction of $\Delta yugS::mls$      |
| DLP685      | GAGGGTTGCCAGAGTTAAAGGATCCCTCGACGCCGAAGATCACC  | Construction of $\Delta yugS::mls$      |
| DLP686      | GCTTCTTTTGCAGCGACGCC                          | Construction of $\Delta yugS::mls$      |
| DLP675      | CTGCTTTTTCGCGTGGATGG                          | PCR verification of $\Delta chaA::spec$ |
| DLP677      | CGTAGCGAGGGCAAGGGTTTATTGTTTTCTAAAATCTG        | PCR verification of $\Delta chaA::spec$ |
| DLP679      | CTACGGCTTCCTTCCACCAA                          | PCR verification of $\Delta yugS::mls$  |
| DLP565      | GCCGACTGCGCAAAGACATAATCG                      | PCR verification of $\Delta yugS::mls$  |

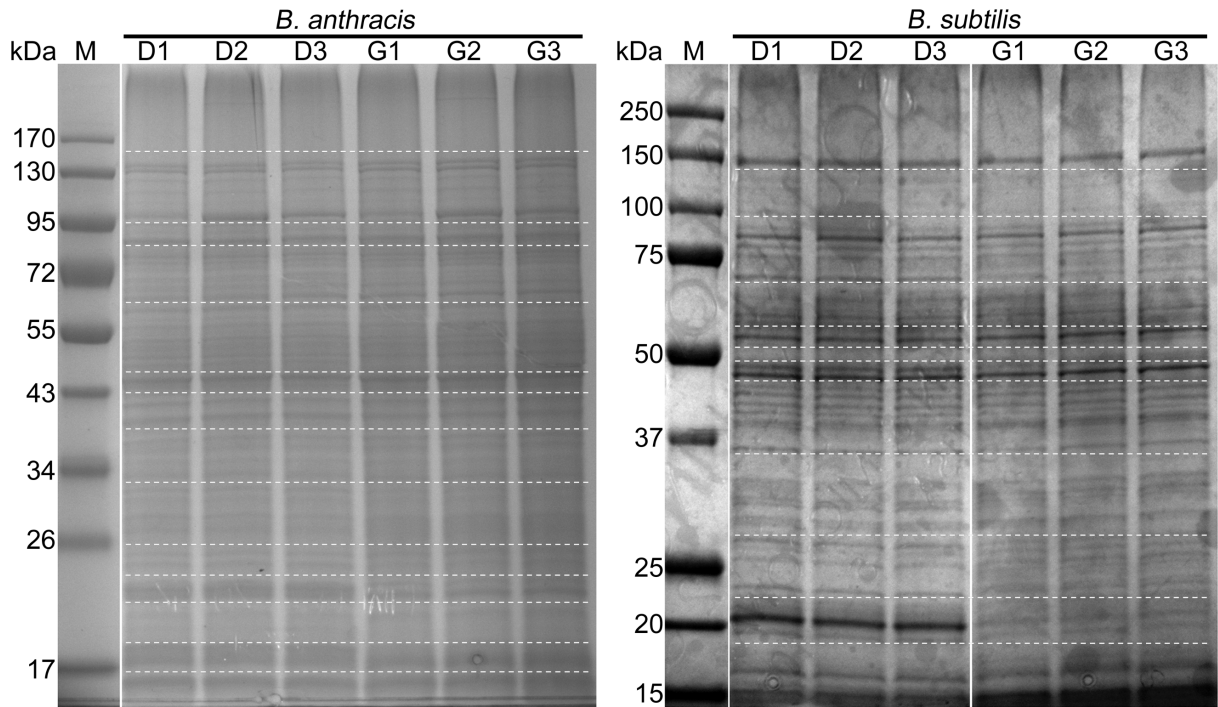

**Figure S1. SDS-PAGE separation of *B. anthracis* and *B. subtilis* spore membrane preparations.** Samples from three independent dormant (D1, D2, D3) and germinated (G1, G2, G3) spore preparations were prepared and broken, and membrane fractions were purified as described in Materials and Methods. Protein concentrations were determined by amino acid analysis, and equal amounts of protein from each preparation were loaded on gels. Gels were stained with Coomassie blue. The positions at which each lane was cut into slices are indicated by dashed lines. The masses of standard protein markers (M) are shown to the left of each gel.

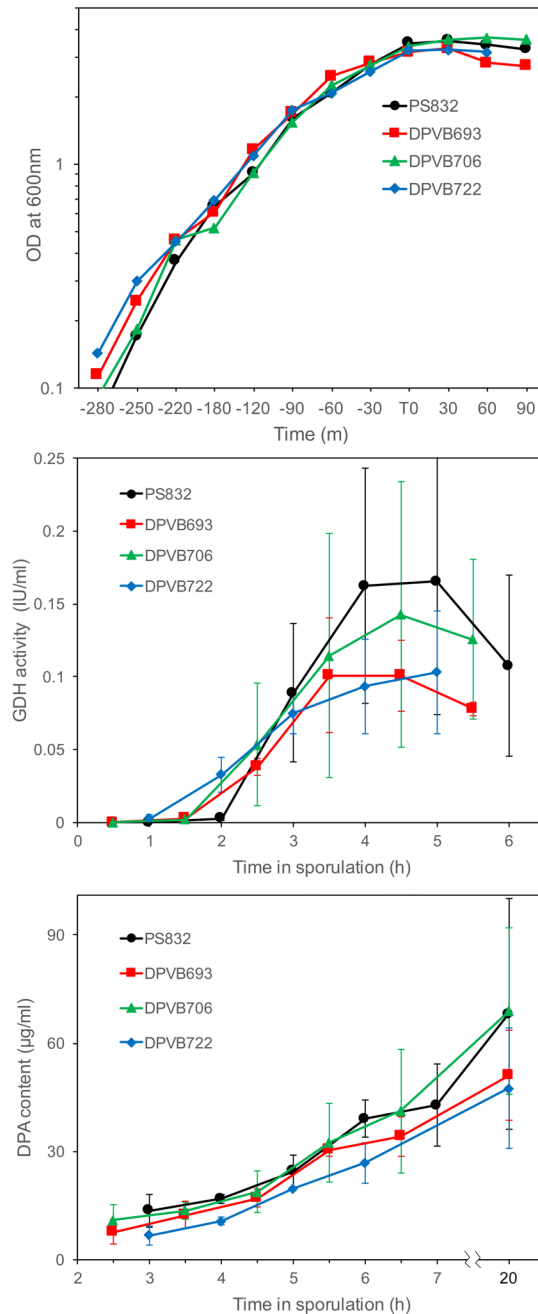

**Figure S2. Growth and sporulation of putative ion transporter mutant strains of *B. subtilis*.** A) Strains were grown with shaking in 2xSG medium at 37°C and O.D.<sub>600</sub> was measured. Time 0 was the estimated time of initiation of sporulation (T<sub>0</sub>) for each strain. B) Samples were collected for measuring GDH activity as previously described (12). Values are averages of three assays and error bars are standard deviations. C) Samples were removed starting at T<sub>3</sub> for measurement of DPA accumulation. DPA was quantified using a colorimetric assay as previously described (12). Values are averages of three assays and error bars are standard deviations.

## References

1. **Kuwana R, Kasahara Y, Fujibayashi M, Takamatsu H, Ogasawara N, Watabe K.** 2002. Proteomics characterization of novel spore proteins of *Bacillus subtilis*. *Microbiology* **148**:3971-3982.
2. **Swarge BN, Roseboom W, Zheng L, Abhyankar WR, Brul S, de Koster CG, de Koning LJ.** 2018. "One-Pot" Sample Processing Method for Proteome-Wide Analysis of Microbial Cells and Spores. *Proteomics Clin Appl*:e1700169.
3. **Zheng L, Abhyankar W, Ouwering N, Dekker HL, van Veen H, van der Wel NN, Roseboom W, de Koning LJ, Brul S, de Koster CG.** 2016. *Bacillus subtilis* Spore Inner Membrane Proteome. *J Proteome Res* **15**:585-594.
4. **Delvecchio VG, Connolly JP, Alefantis TG, Walz A, Quan MA, Patra G, Ashton JM, Whittington JT, Chafin RD, Liang X, Grewal P, Khan AS, Mujer CV.** 2006. Proteomic profiling and identification of immunodominant spore antigens of *Bacillus anthracis*, *Bacillus cereus*, and *Bacillus thuringiensis*. *Appl Environ Microbiol* **72**:6355-6363.
5. **Jagtap P, Michailidis G, Zielke R, Walker AK, Patel N, Strahler JR, Driks A, Andrews PC, Maddock JR.** 2006. Early events of *Bacillus anthracis* germination identified by time-course quantitative proteomics. *Proteomics* **6**:5199-5211.
6. **Eymann C, Dreisbach A, Albrecht D, Bernhardt J, Becher D, Gentner S, Tam le T, Buttner K, Buurman G, Scharf C, Venz S, Volker U, Hecker M.** 2004. A comprehensive proteome map of growing *Bacillus subtilis* cells. *Proteomics* **4**:2849-2876.
7. **Dreisbach A, Otto A, Becher D, Hammer E, Teumer A, Gouw JW, Hecker M, Volker U.** 2008. Monitoring of changes in the membrane proteome during stationary phase adaptation of *Bacillus subtilis* using in vivo labeling techniques. *Proteomics* **8**:2062-2076.
8. **Francis AW, Ruggiero CE, Koppisch AT, Dong J, Song J, Brettin T, Iyer S.** 2005. Proteomic analysis of *Bacillus anthracis* Sterne vegetative cells. *Biochim Biophys Acta* **1748**:191-200.
9. **Eichenberger P, Jensen ST, Conlon EM, van Ooij C, Silvaggi J, Gonzalez-Pastor JE, Fujita M, Ben-Yehuda S, Stragier P, Liu JS, Losick R.** 2003. The sigmaE regulon and the identification of additional sporulation genes in *Bacillus subtilis*. *J Mol Biol* **327**:945-972.
10. **Steil L, Serrano M, Henriques AO, Volker U.** 2005. Genome-wide analysis of temporally regulated and compartment-specific gene expression in sporulating cells of *Bacillus subtilis*. *Microbiol* **151**:399-420.
11. **Wang ST, Setlow B, Conlon EM, Lyon JL, Imamura D, Sato T, Setlow P, Losick R, Eichenberger P.** 2006. The forespore line of gene expression in *Bacillus subtilis*. *J Mol Biol* **358**:16-37.

12. **Nicholson WL, Setlow P.** 1990. Sporulation, germination, and outgrowth., p. 391-450. *In* Harwood CR, Cutting SM (ed.), *Molecular biological methods for Bacillus*. John Wiley & Sons Ltd., Chichester, England.
